# Supplementary material
Source: ML conference proceedings conference paper supplement (https://openreview.net/forum?id=ze7DOLi394)

shared feature vs. shared error (10k)

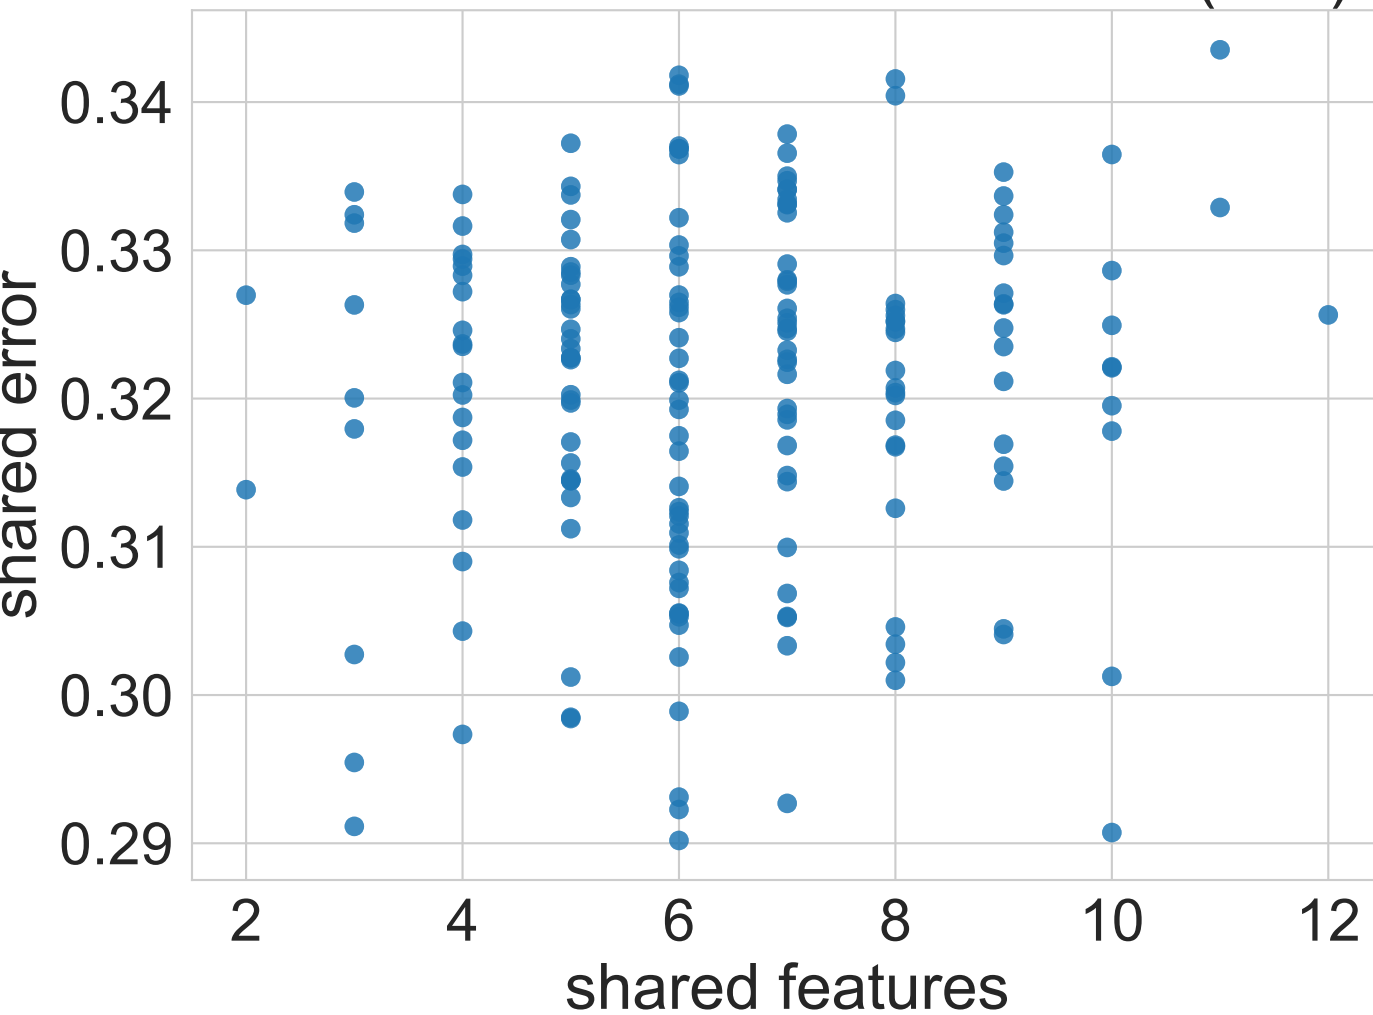

Supplement: supplementary_material [file attachment]

prop agreement function:  $c$

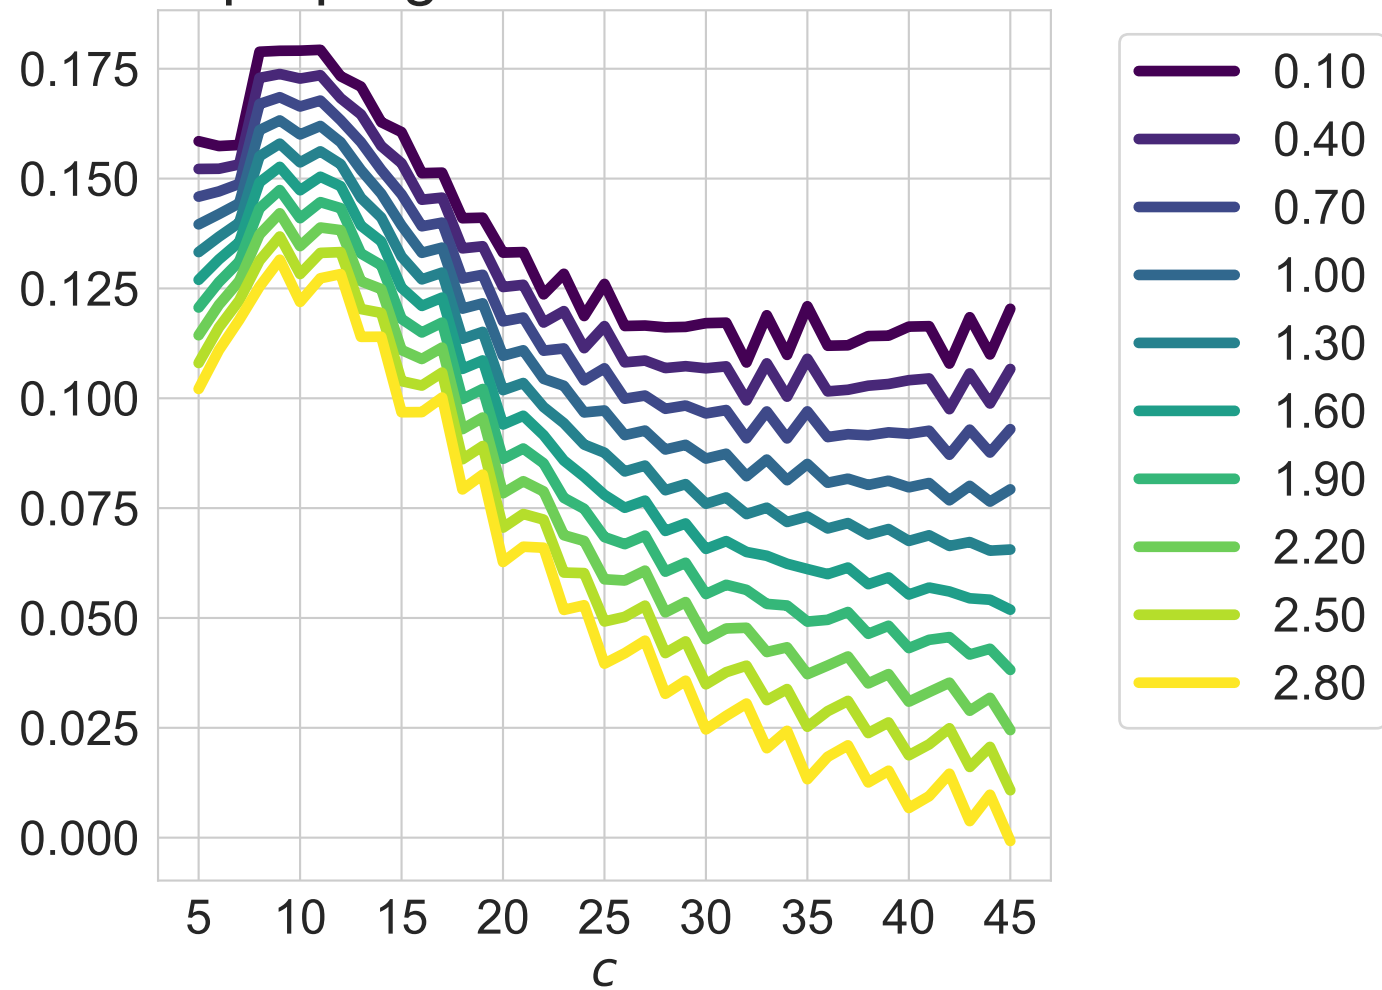

Supplement: supplementary_material [file attachment]

ablating  $n_r \propto n_d$

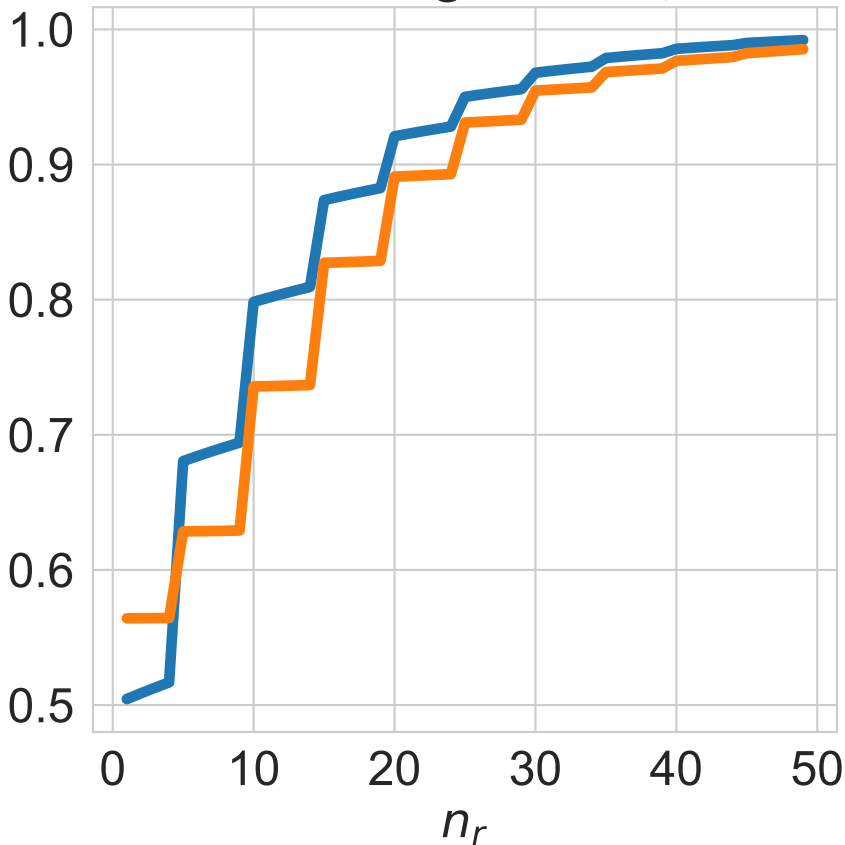

Supplement: supplementary_material [file attachment]

Share feature vs. shared error  
on different architectures

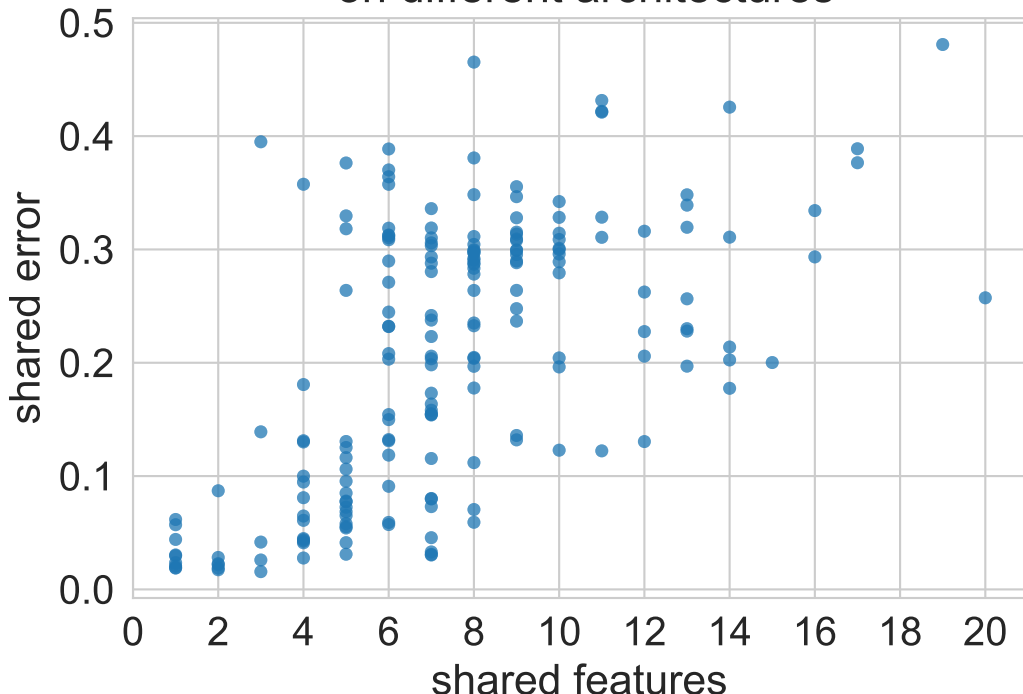

Supplement: supplementary_material [file attachment]

ablating  $n_d$

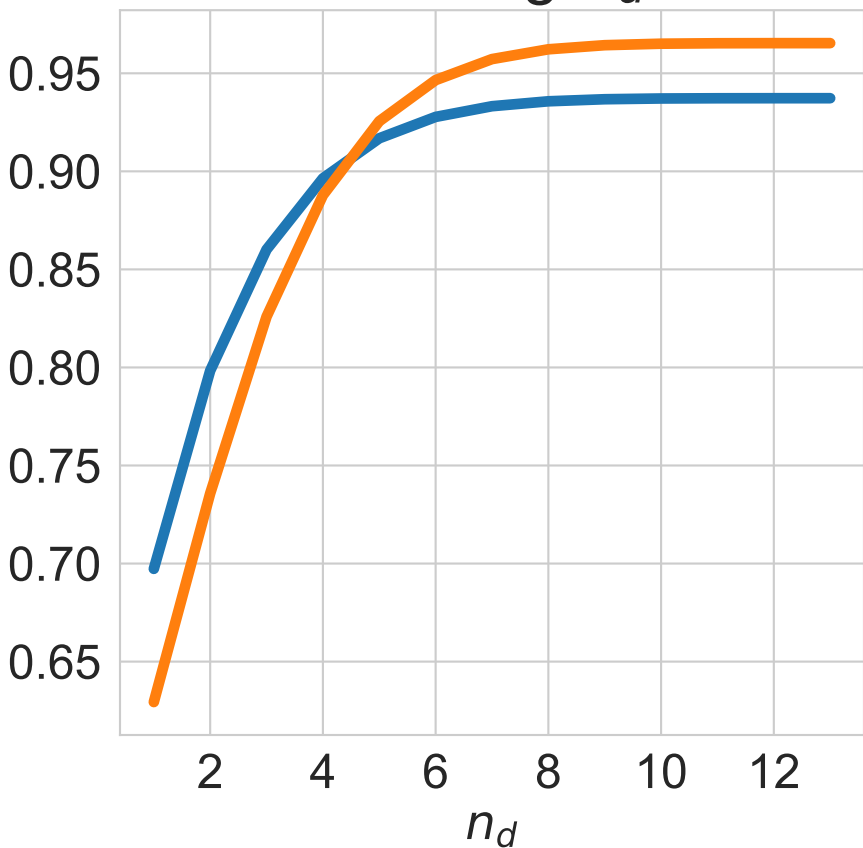

Supplement: supplementary_material [file attachment]

ablating  $t_d$

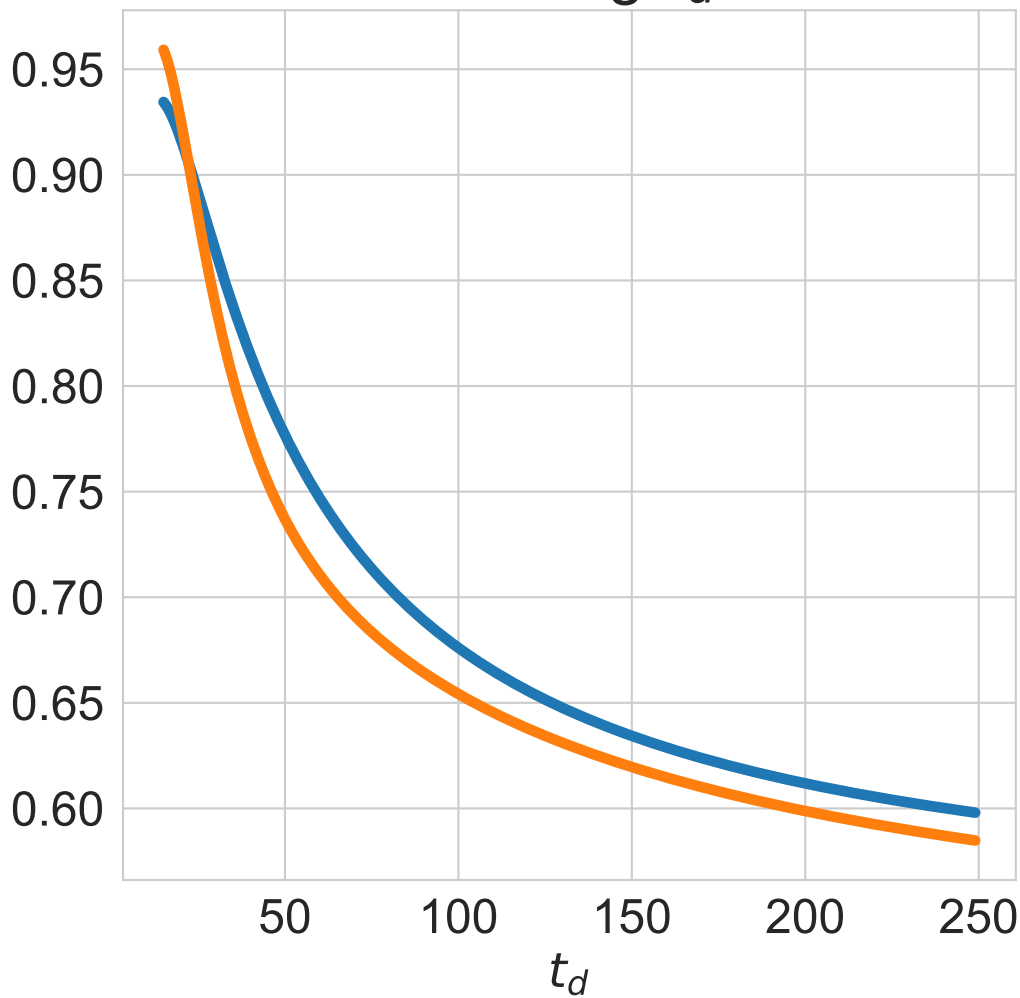

Supplement: supplementary_material [file attachment]

ablating  $p_d$

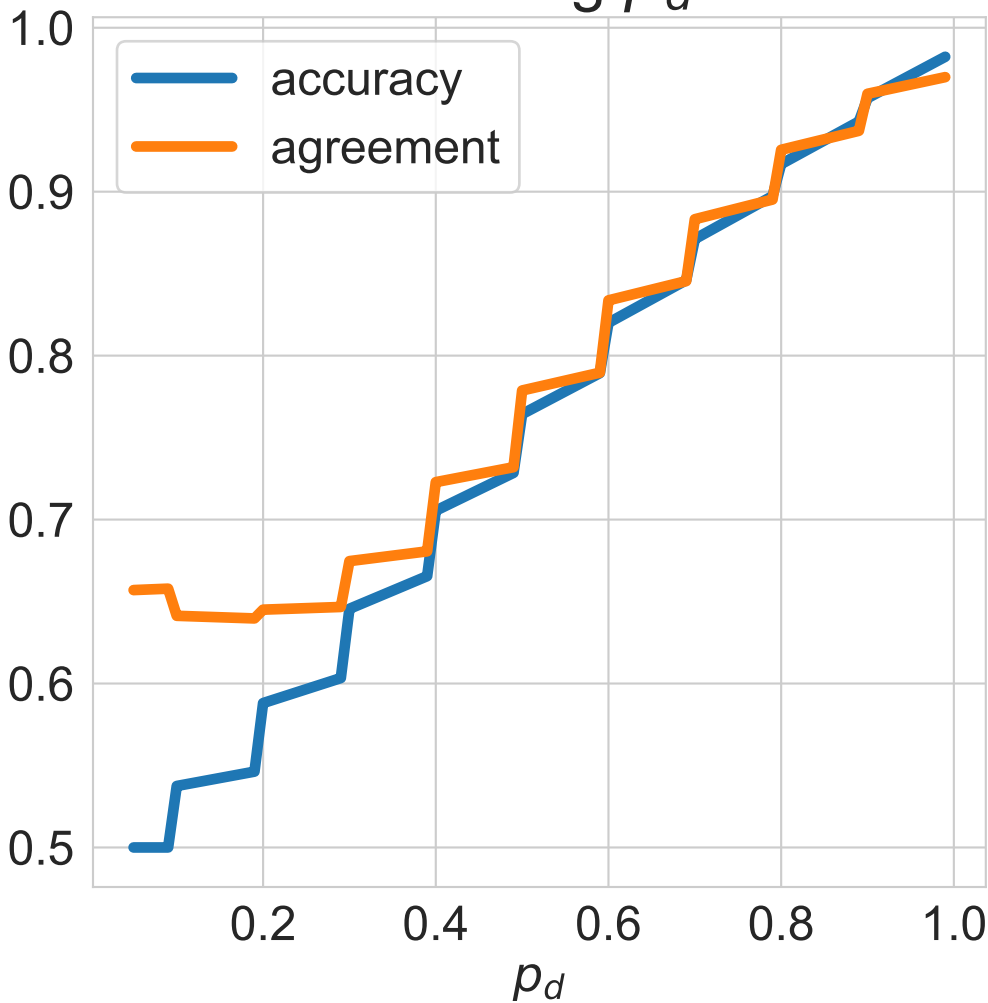

Supplement: supplementary_material [file attachment]

constant agreement function:  $p_d$

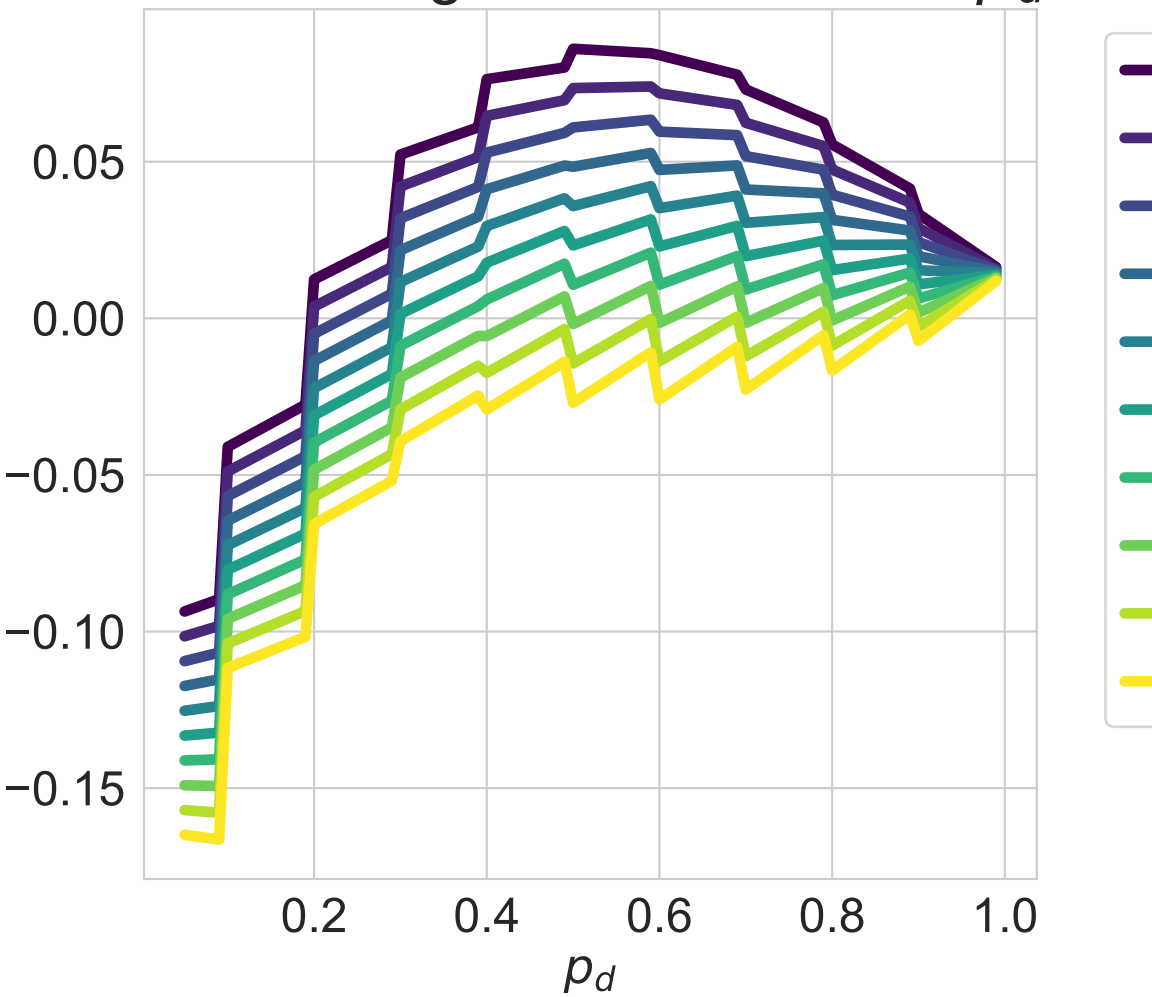

Supplement: supplementary_material [file attachment]

const agreement function:  $c$

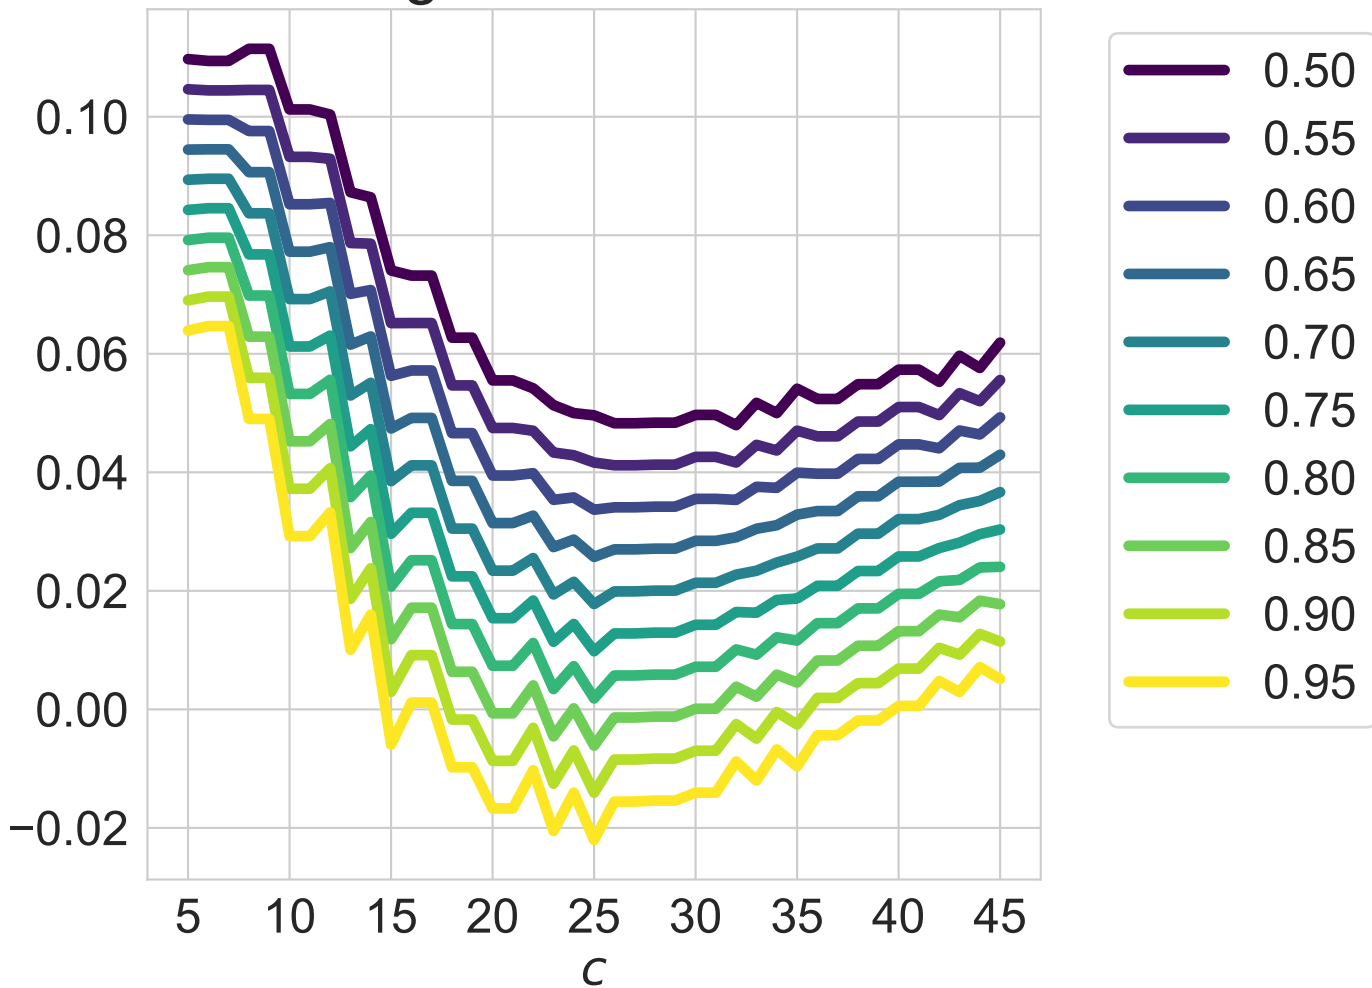

Supplement: supplementary_material [file attachment]

coverage vs expected acc

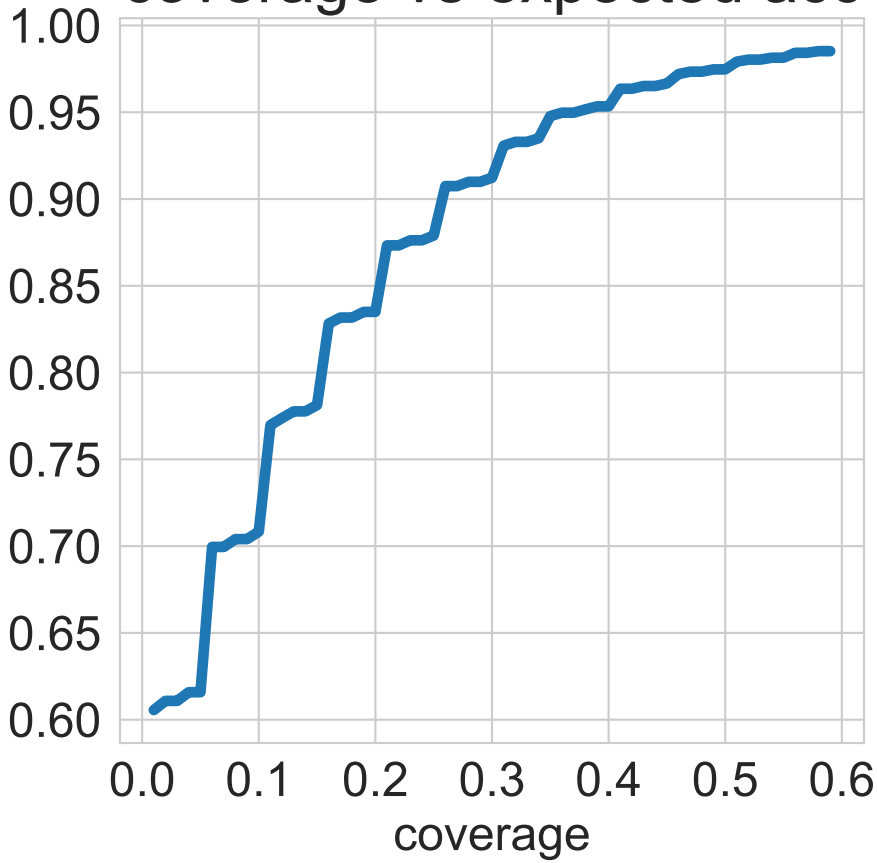

Supplement: supplementary_material [file attachment]

ablating  $t_r$

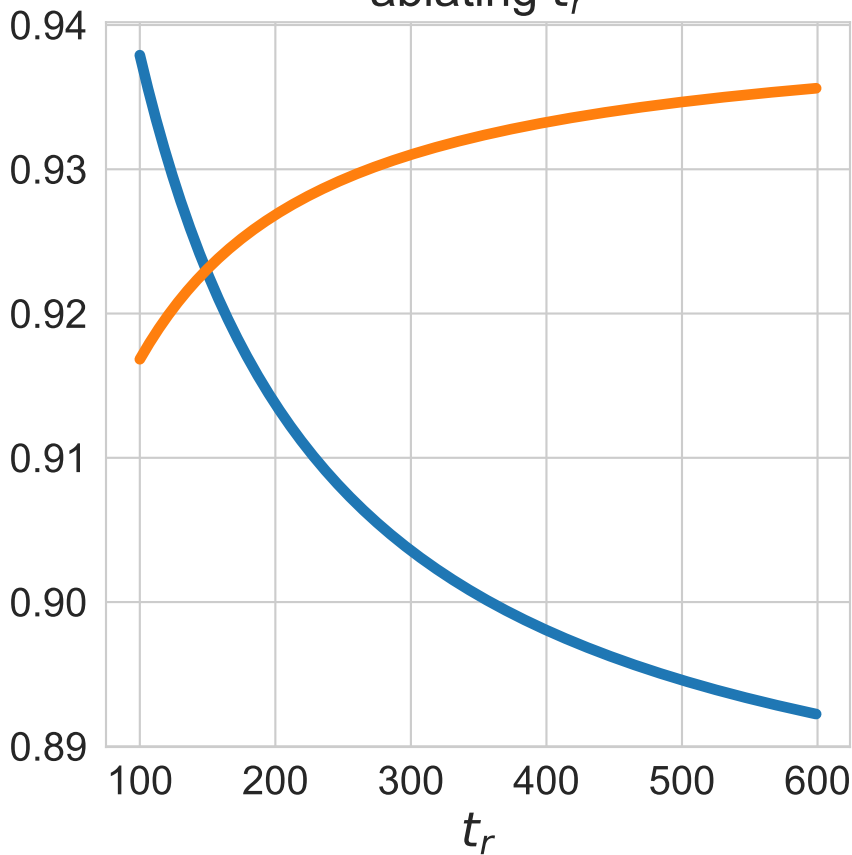

Supplement: supplementary_material [file attachment]

Self-correlation (45k)

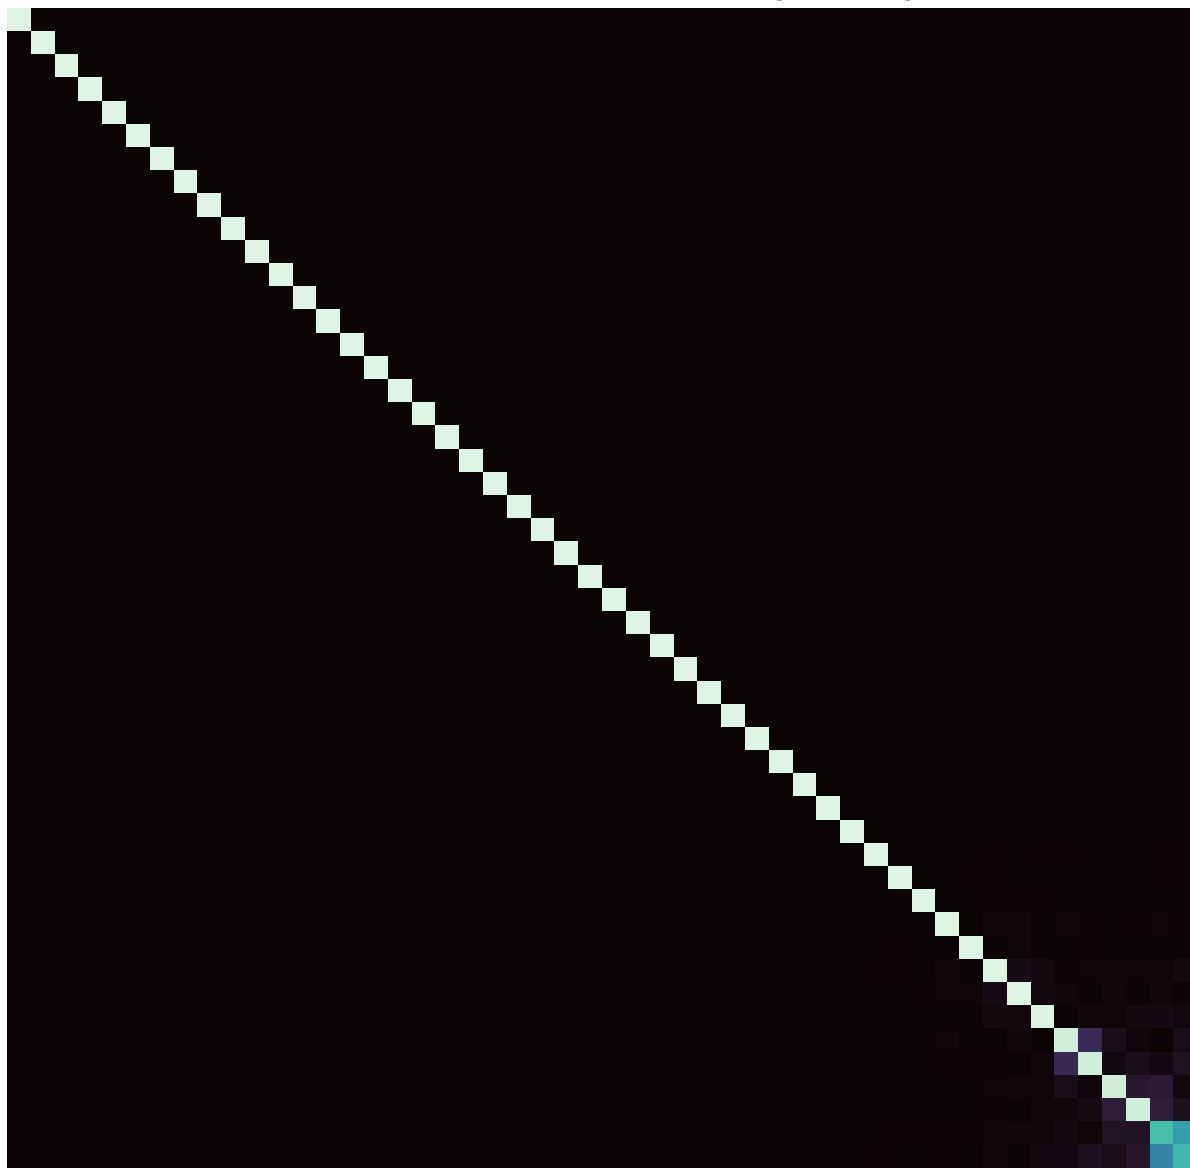

Supplement: supplementary_material [file attachment]

data fraction vs test acc

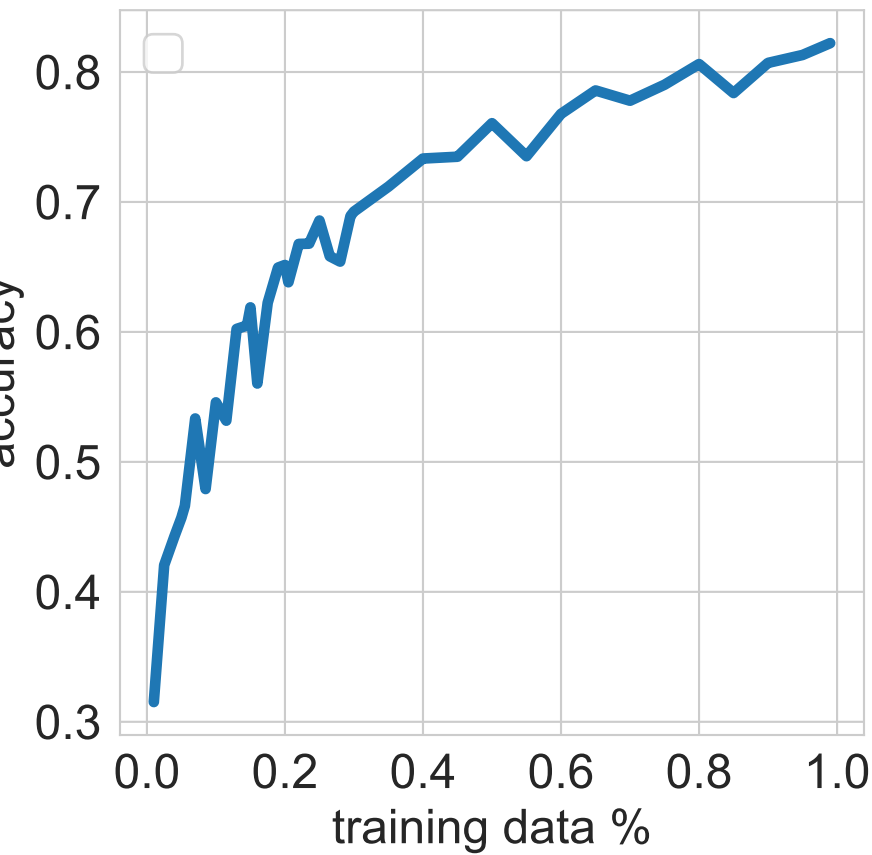

Supplement: supplementary_material [file attachment]

ablating  $t_r$

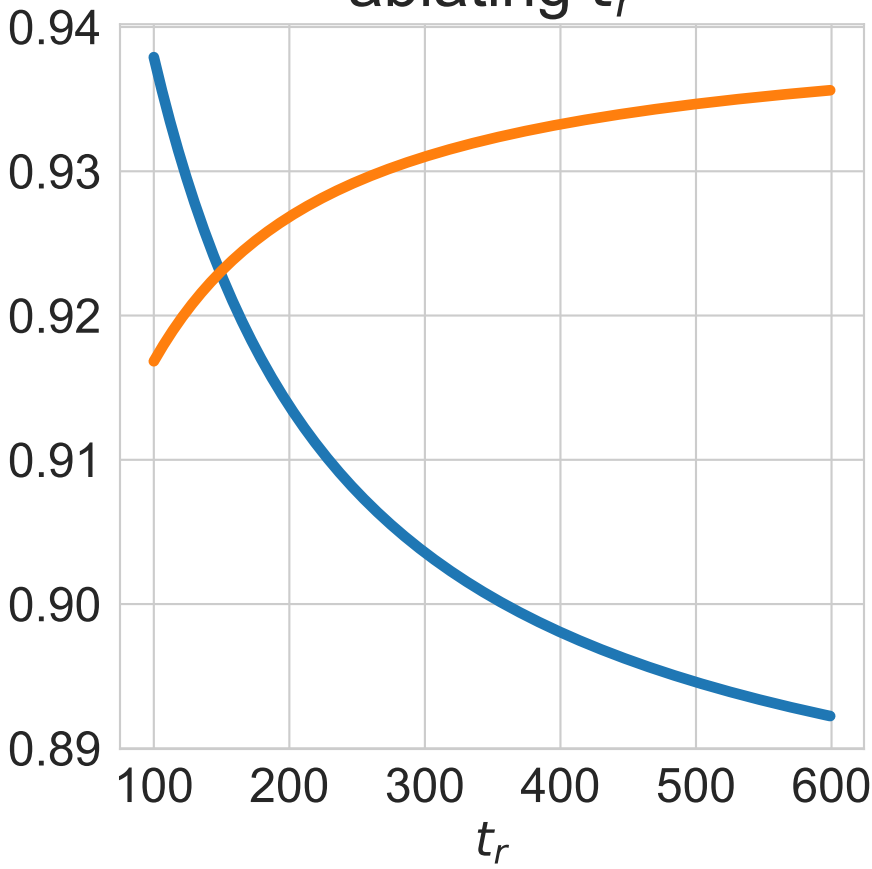

Supplement: supplementary_material [file attachment]

ablating  $n_r$

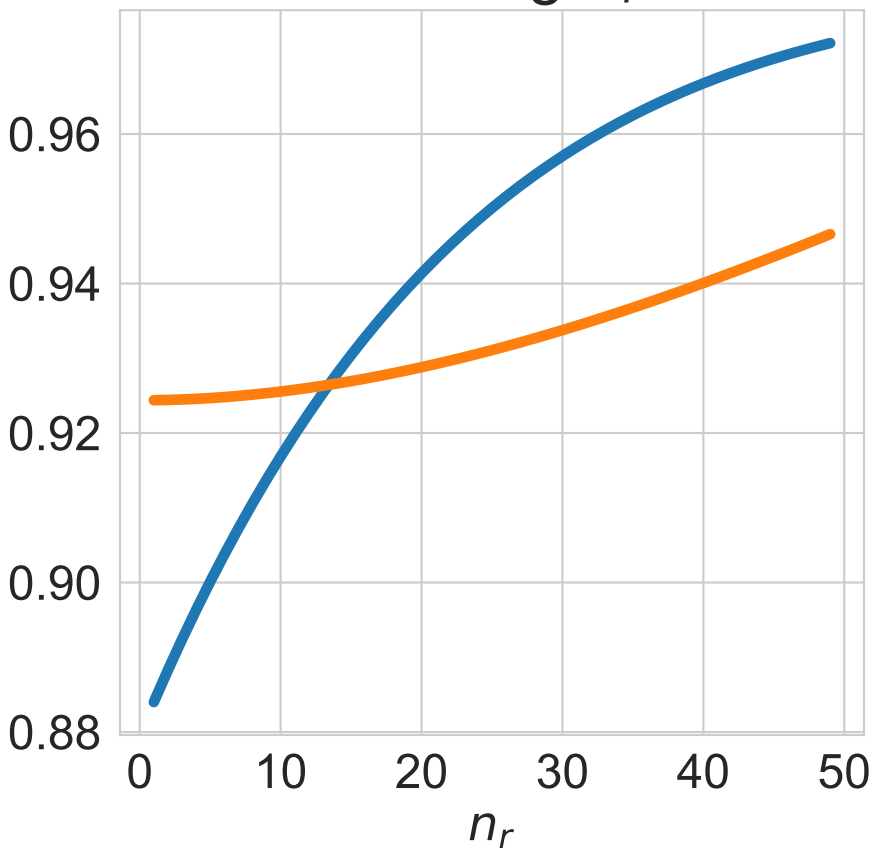

Supplement: supplementary_material [file attachment]

# ablating c

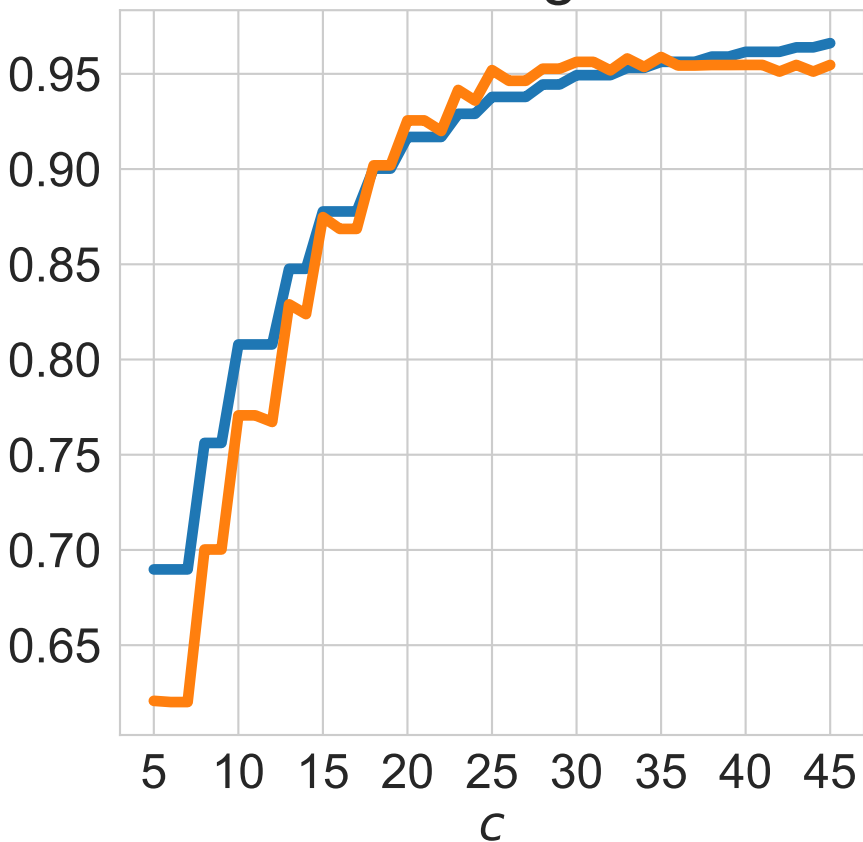

Supplement: supplementary_material [file attachment]

feature frequency (45k)

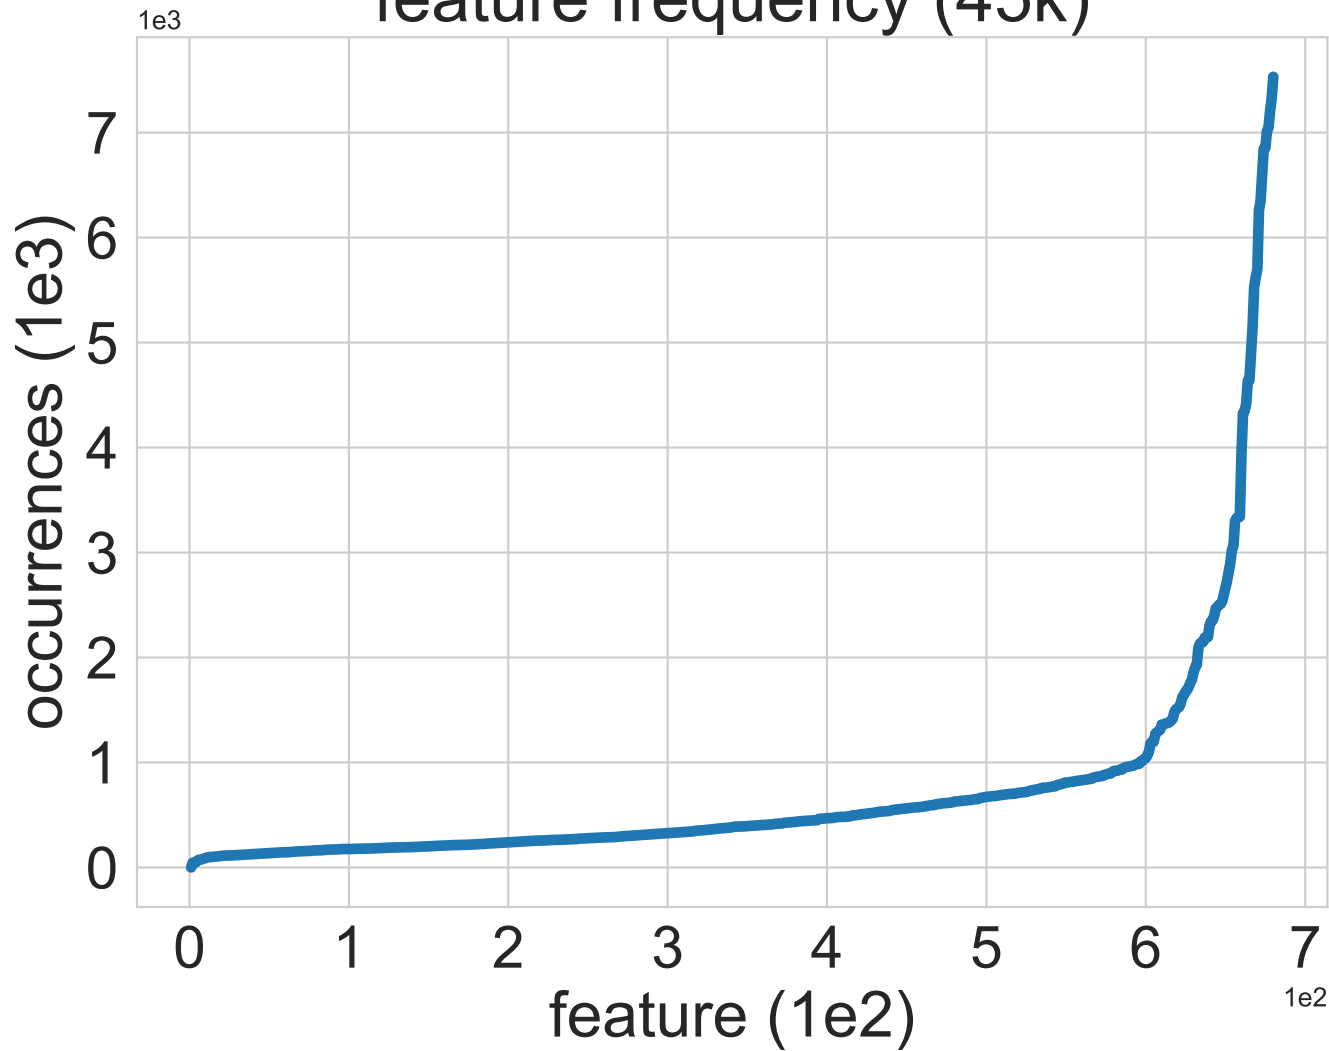

Supplement: supplementary_material [file attachment]

log feature density by confidence (45k)

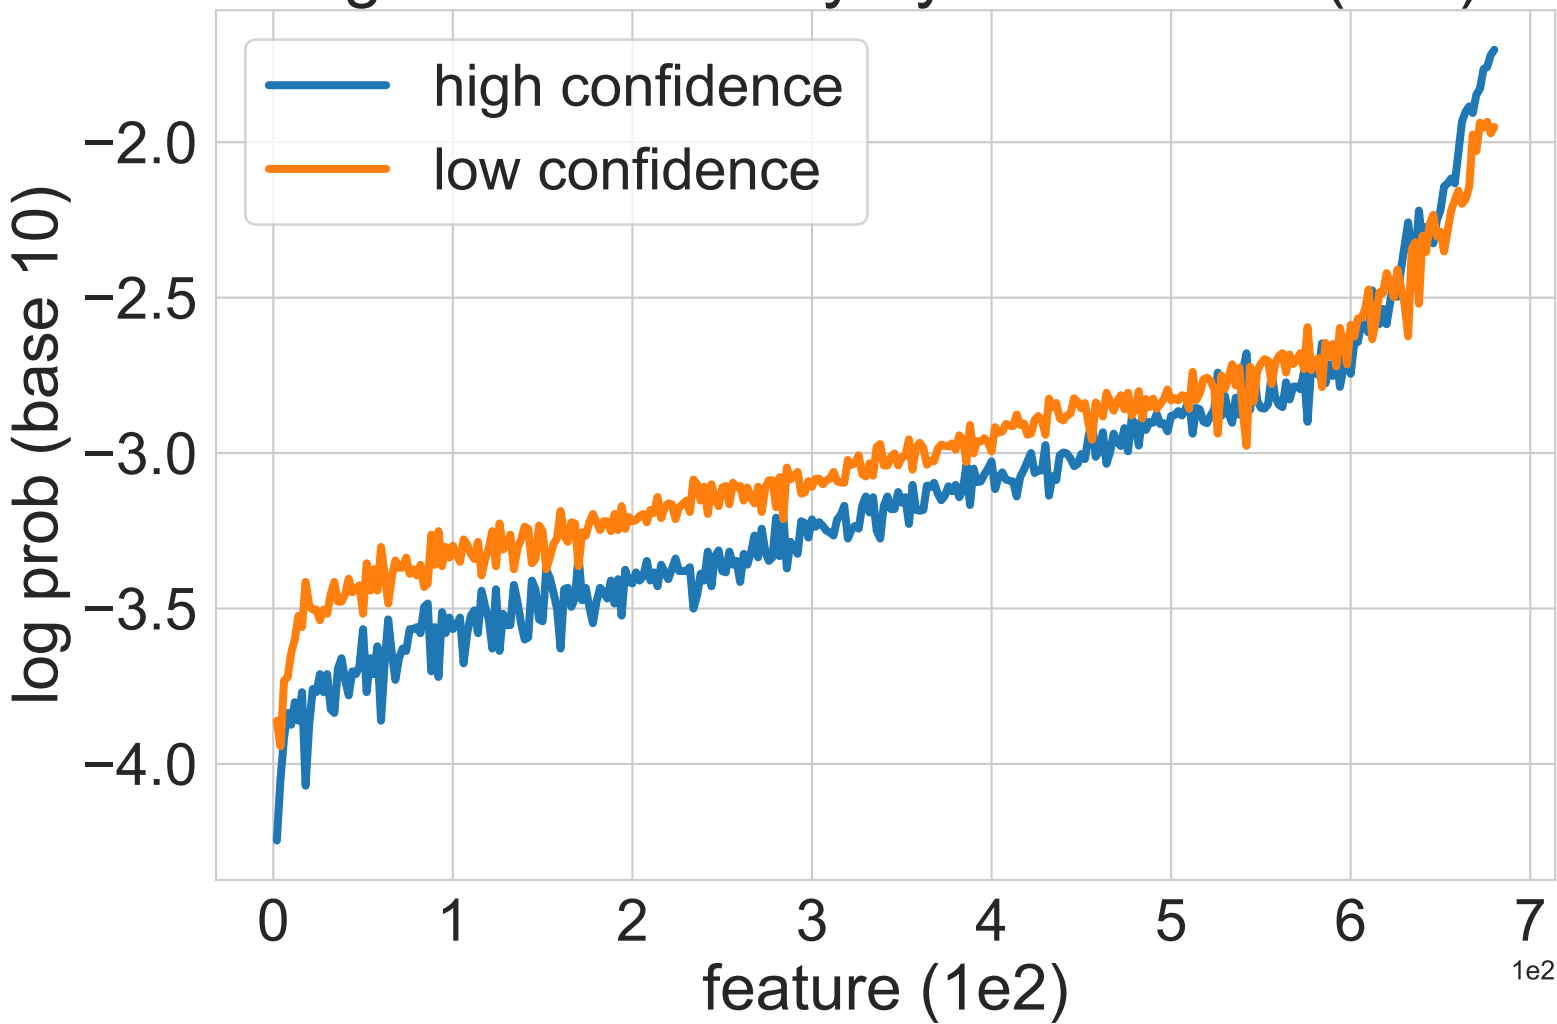

Supplement: supplementary_material [file attachment]

Self-correlation (10k)

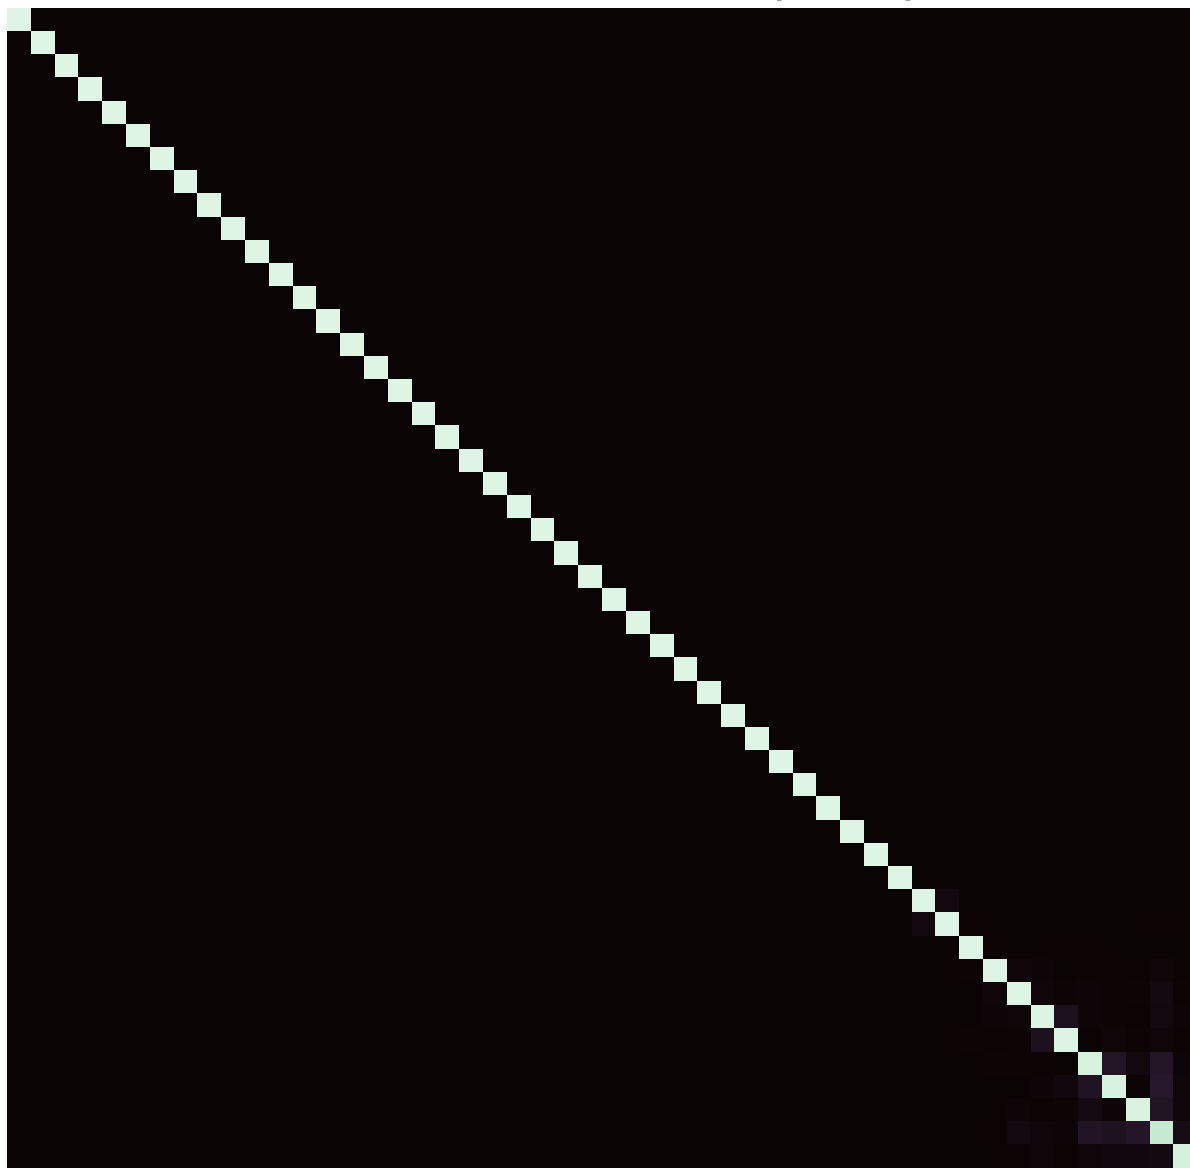

Supplement: supplementary_material [file attachment]

ablating  $t_r \propto t_d$

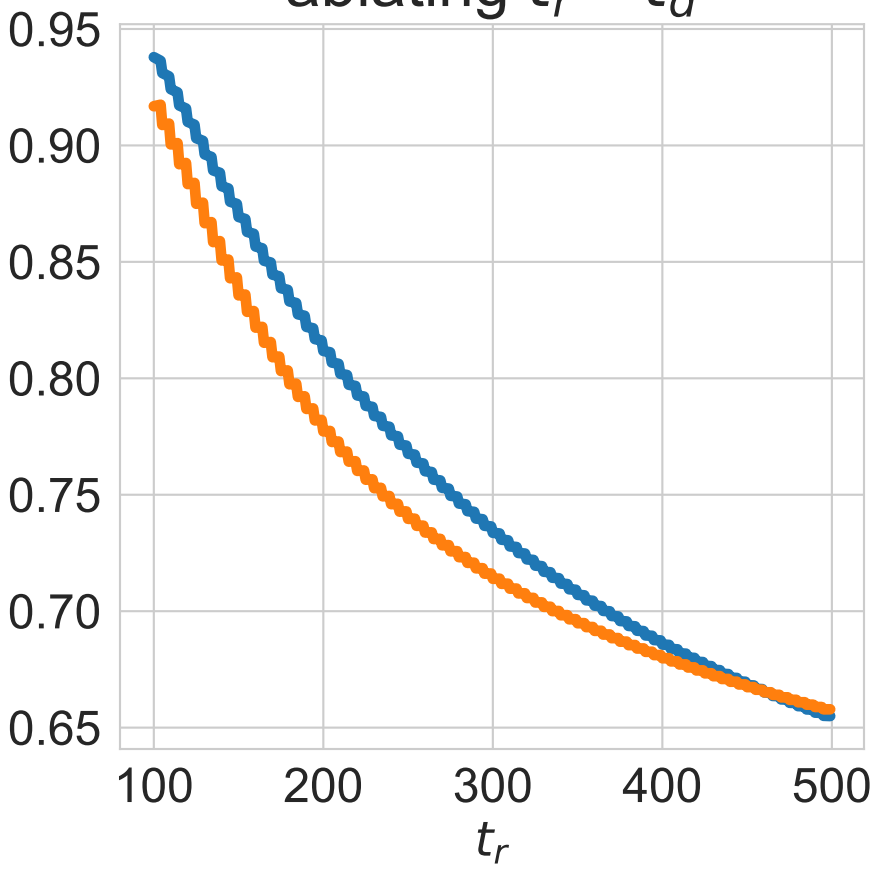

Supplement: supplementary_material [file attachment]

step agreement function:  $p_d$

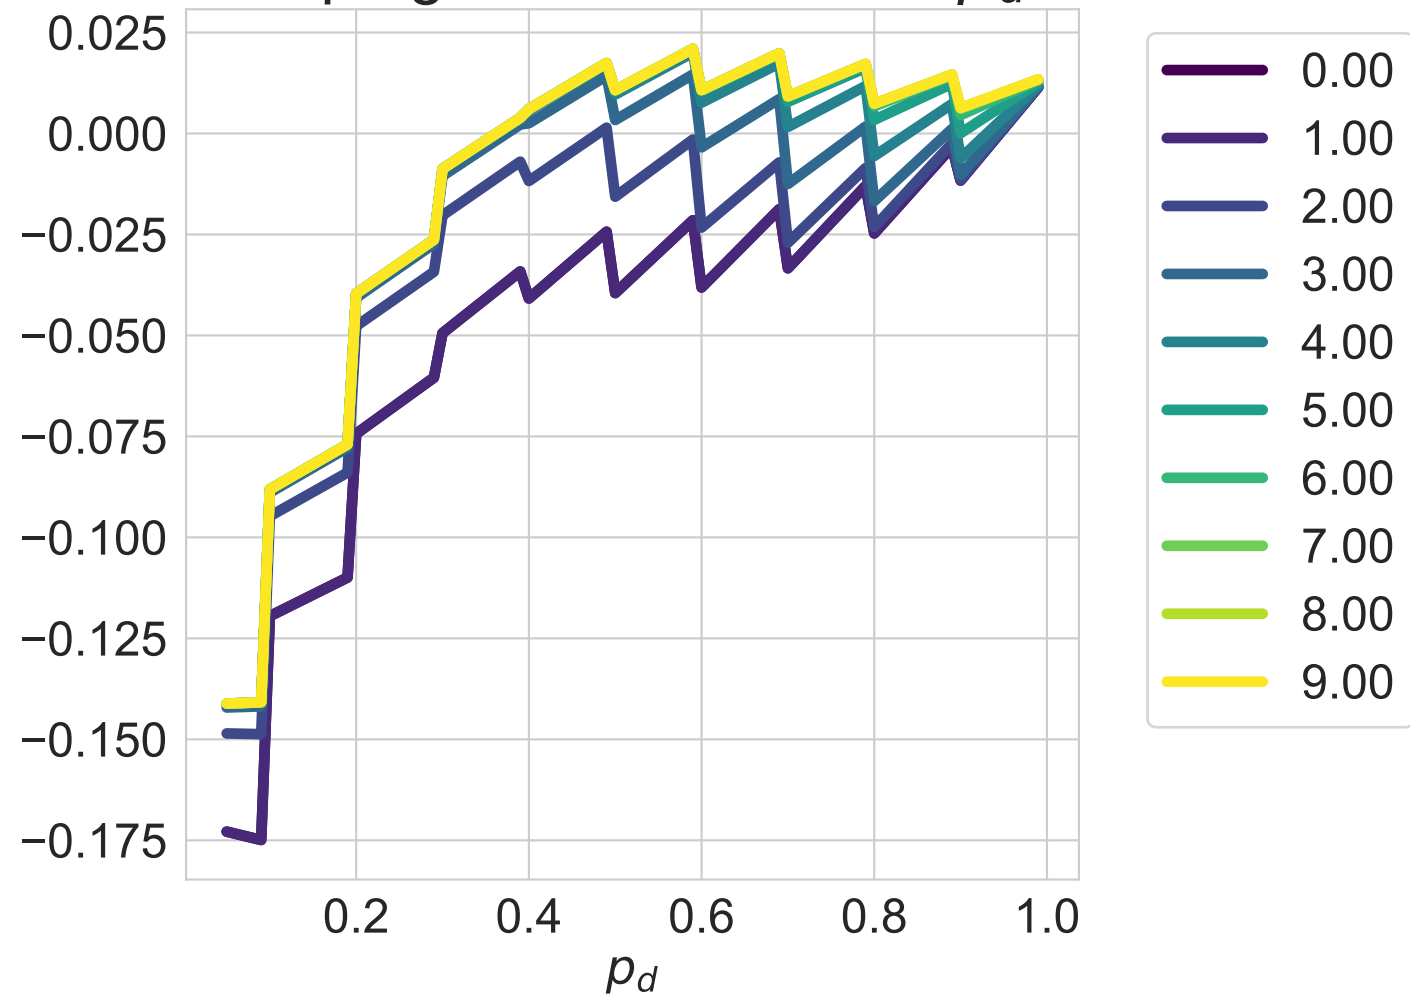

Supplement: supplementary_material [file attachment]

step agreement function:  $n_r \propto n_d$

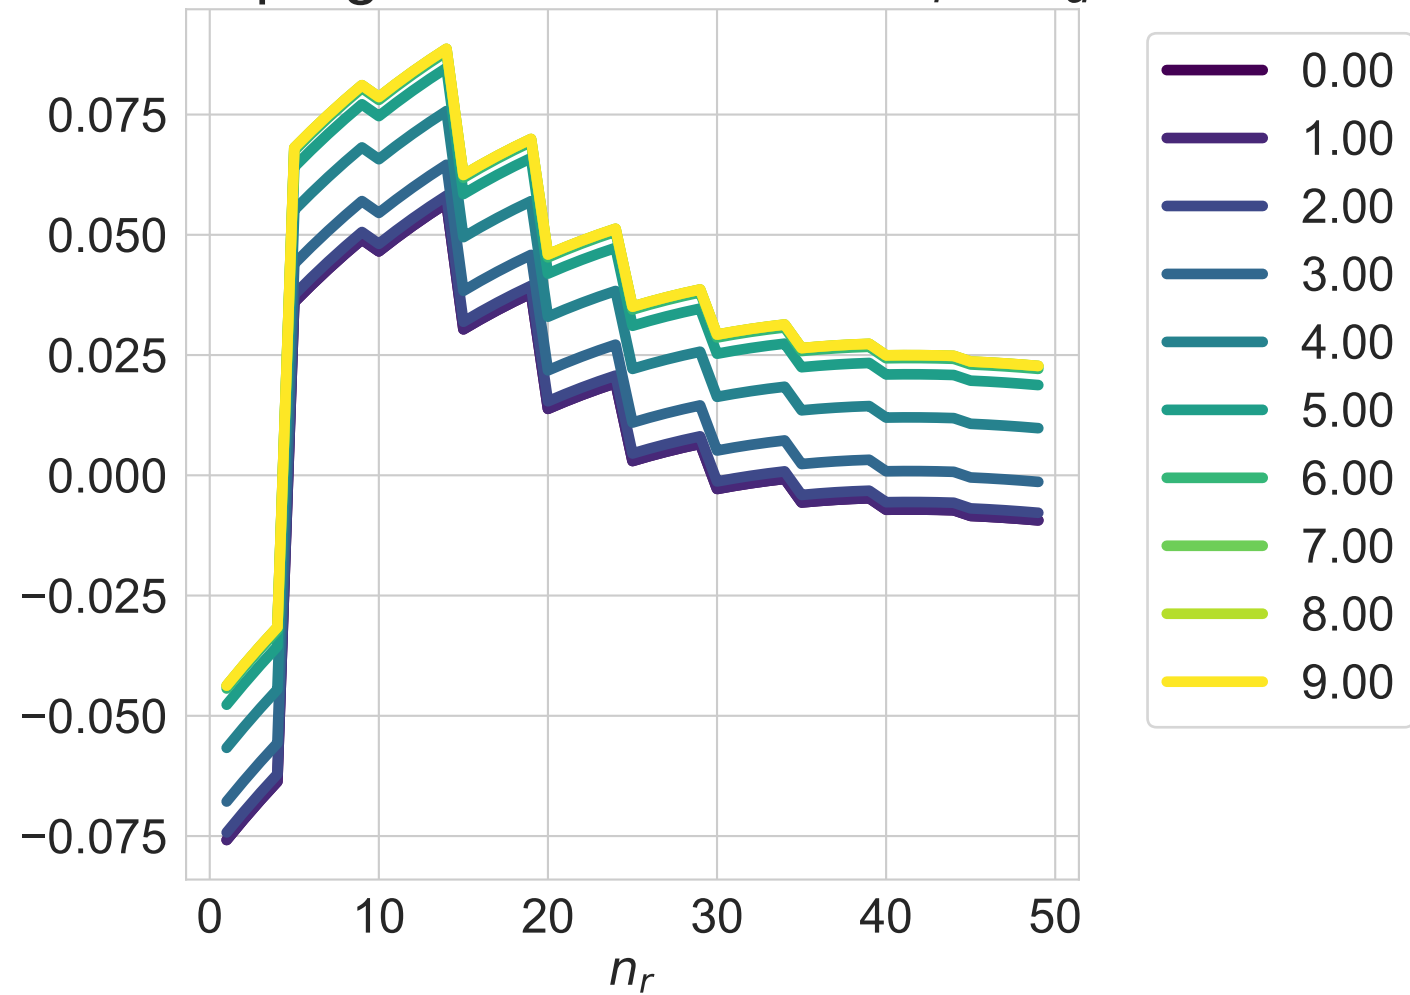

Supplement: supplementary_material [file attachment]

Correlation (45k)

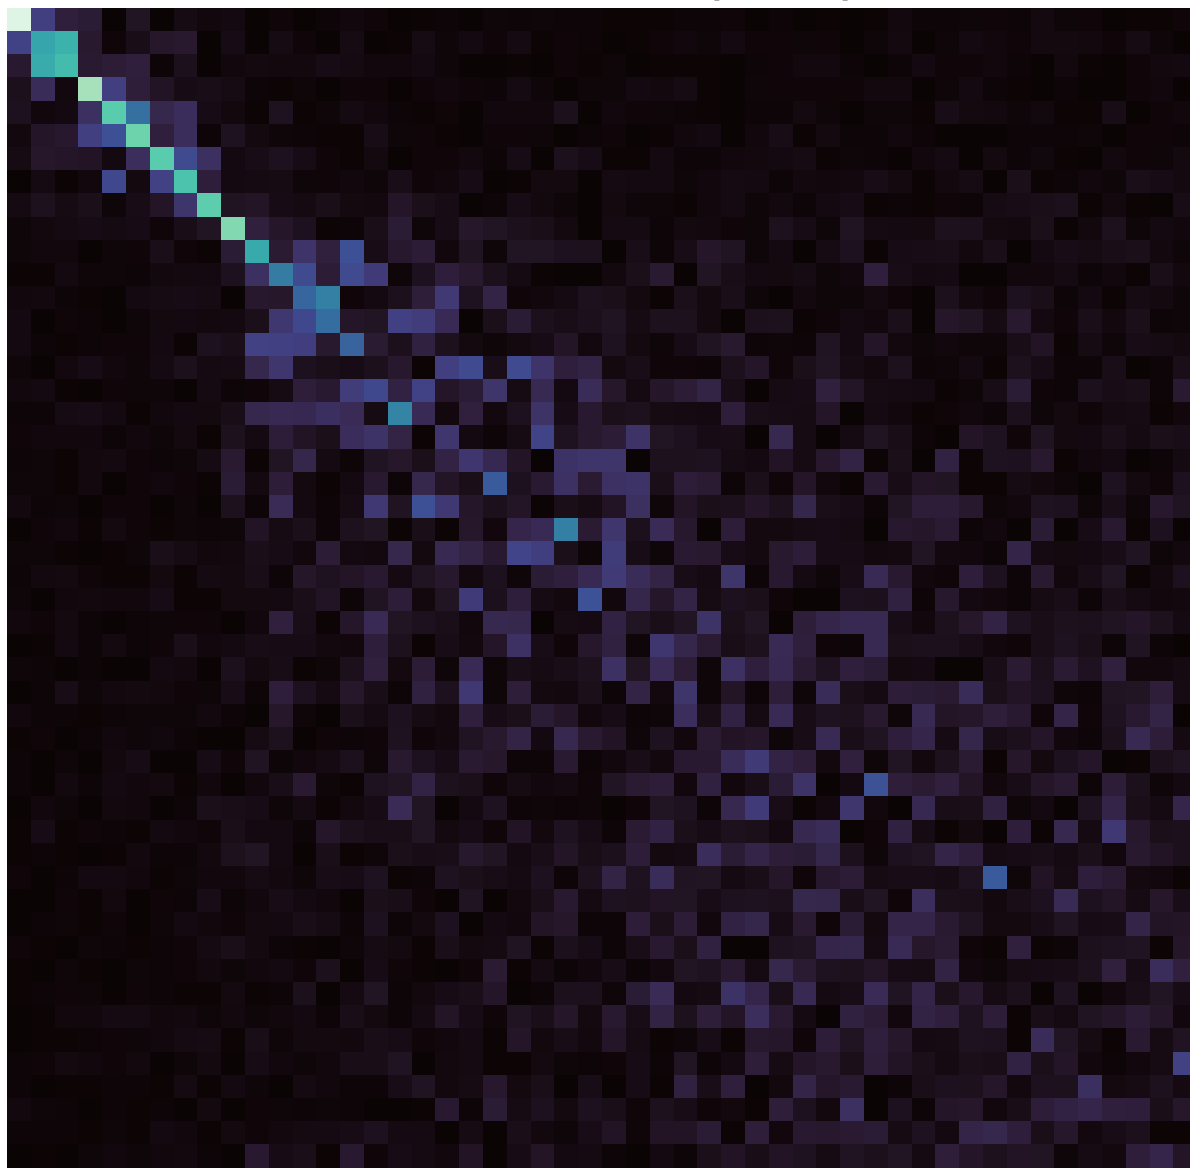

Supplement: supplementary_material [file attachment]

prop agreement function:  $t_r \propto t_d$

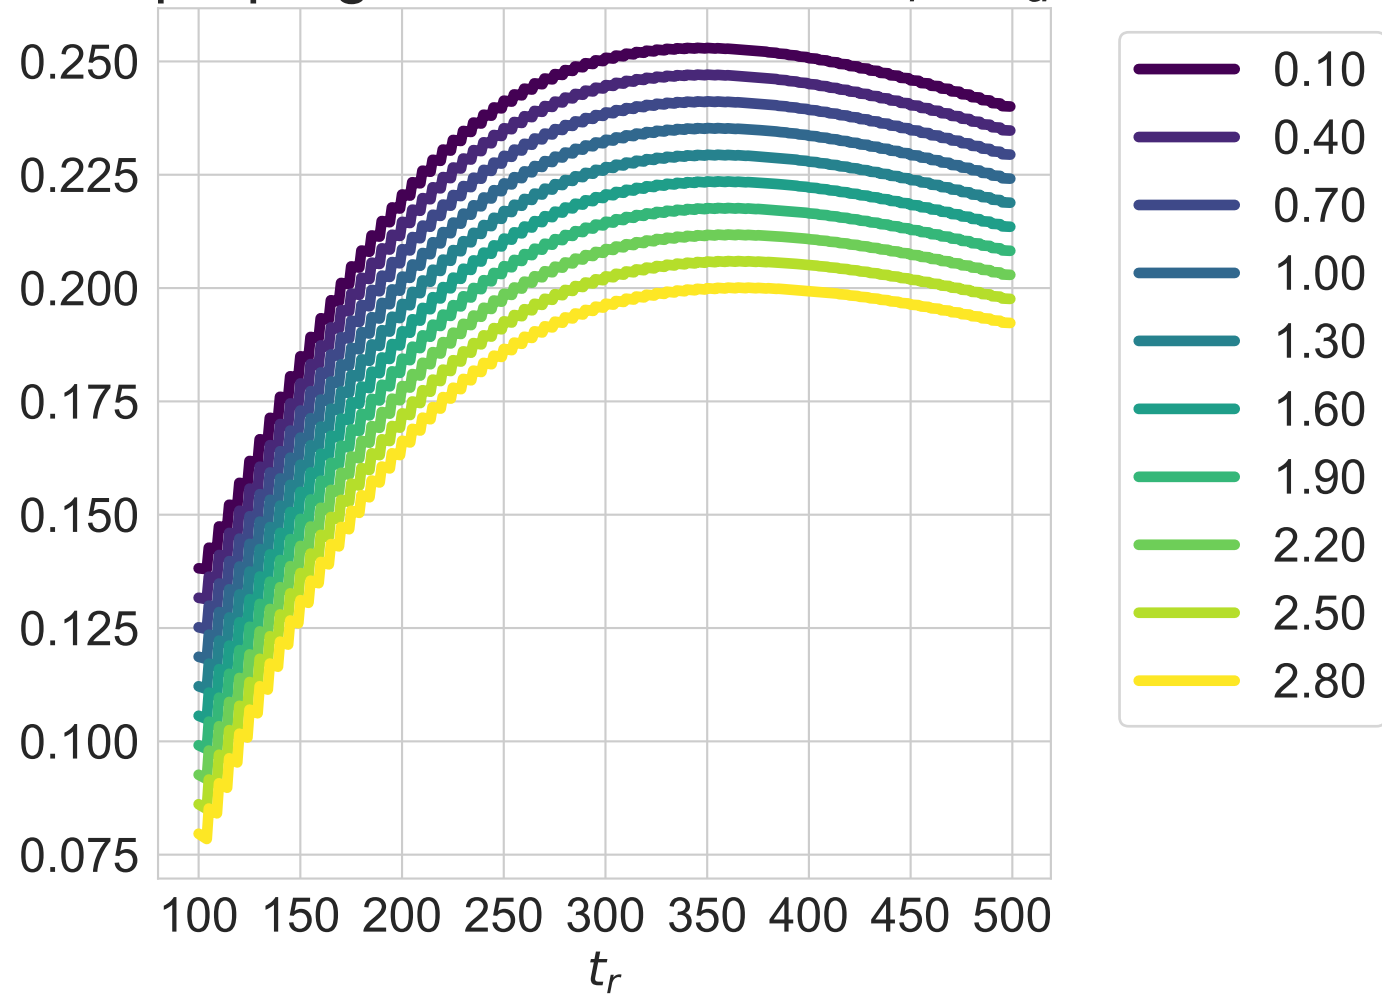

Supplement: supplementary_material [file attachment]

const agreement function:  $p_d$

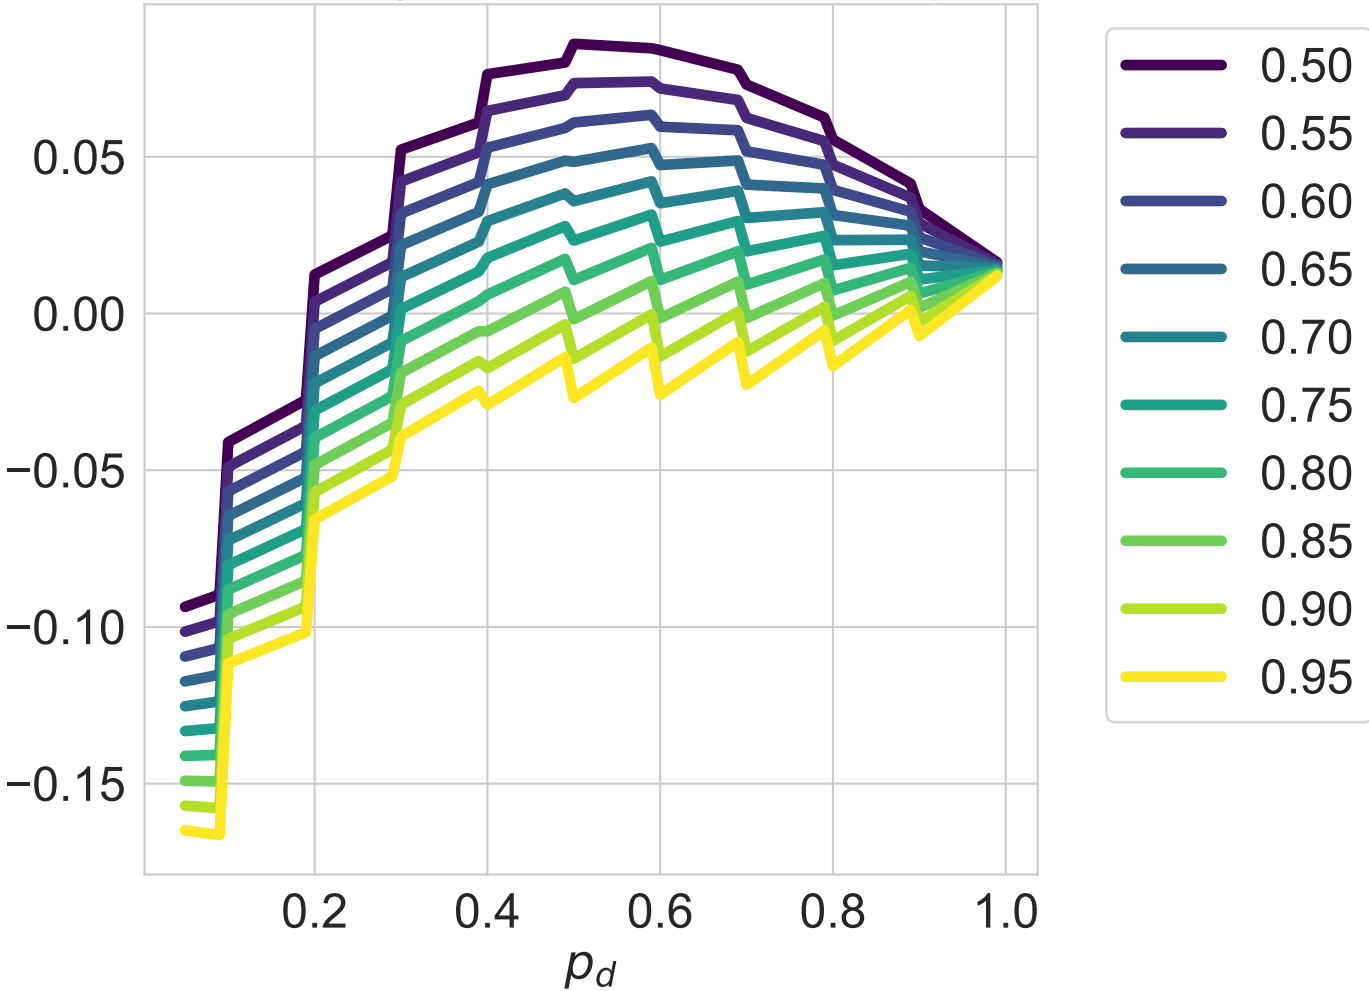

Supplement: supplementary_material [file attachment]

n data vs. n models w/ feat (45k)

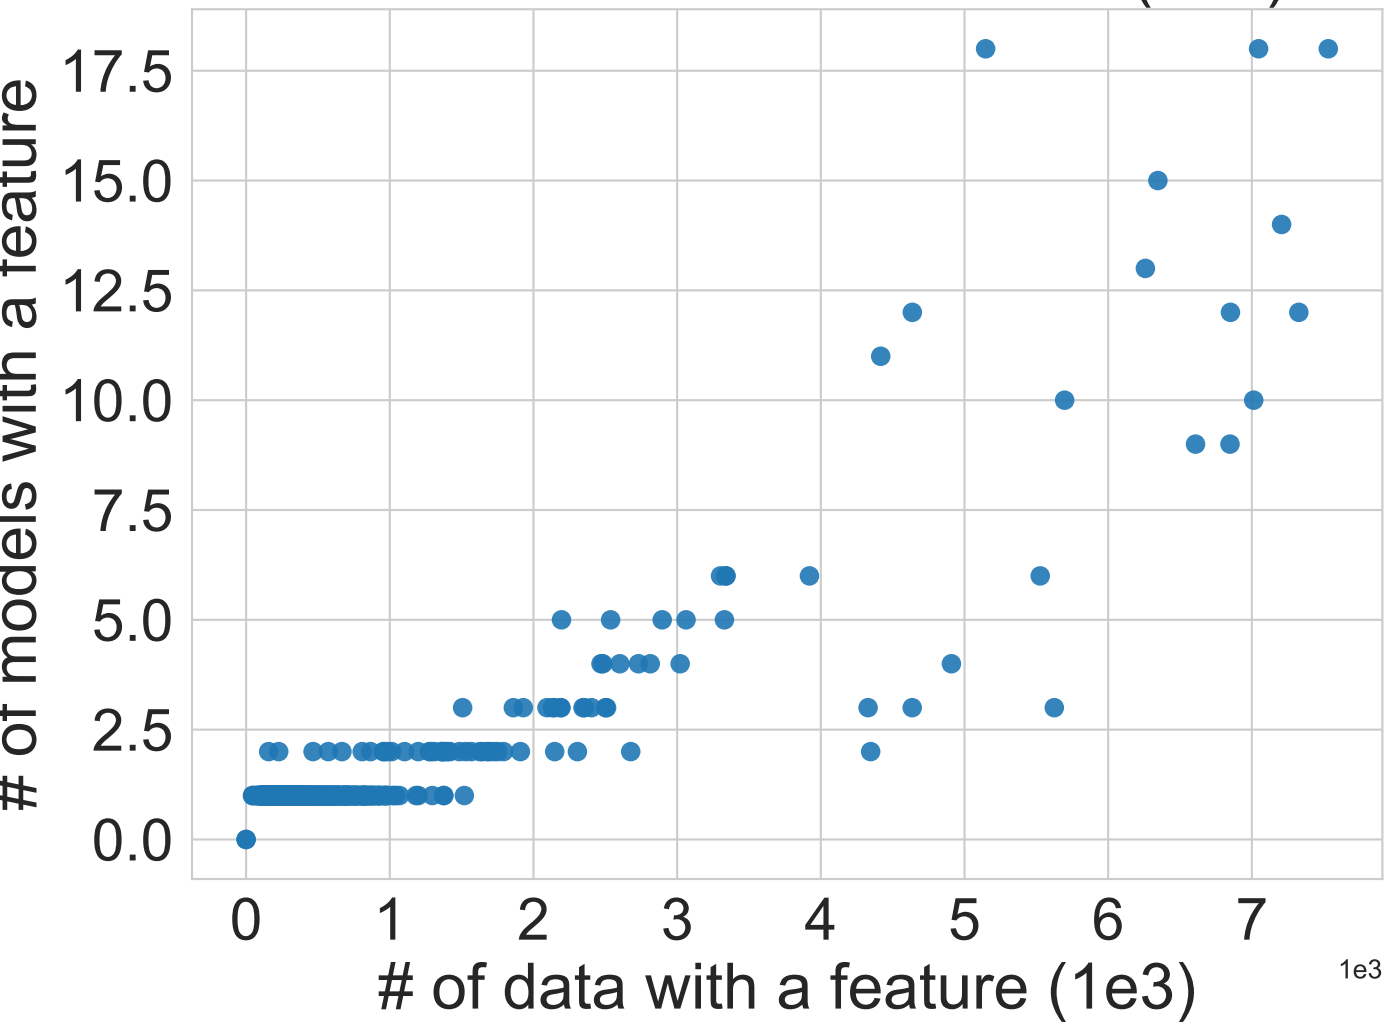

Supplement: supplementary_material [file attachment]

prop agreement function:  $n_r \propto n_d$

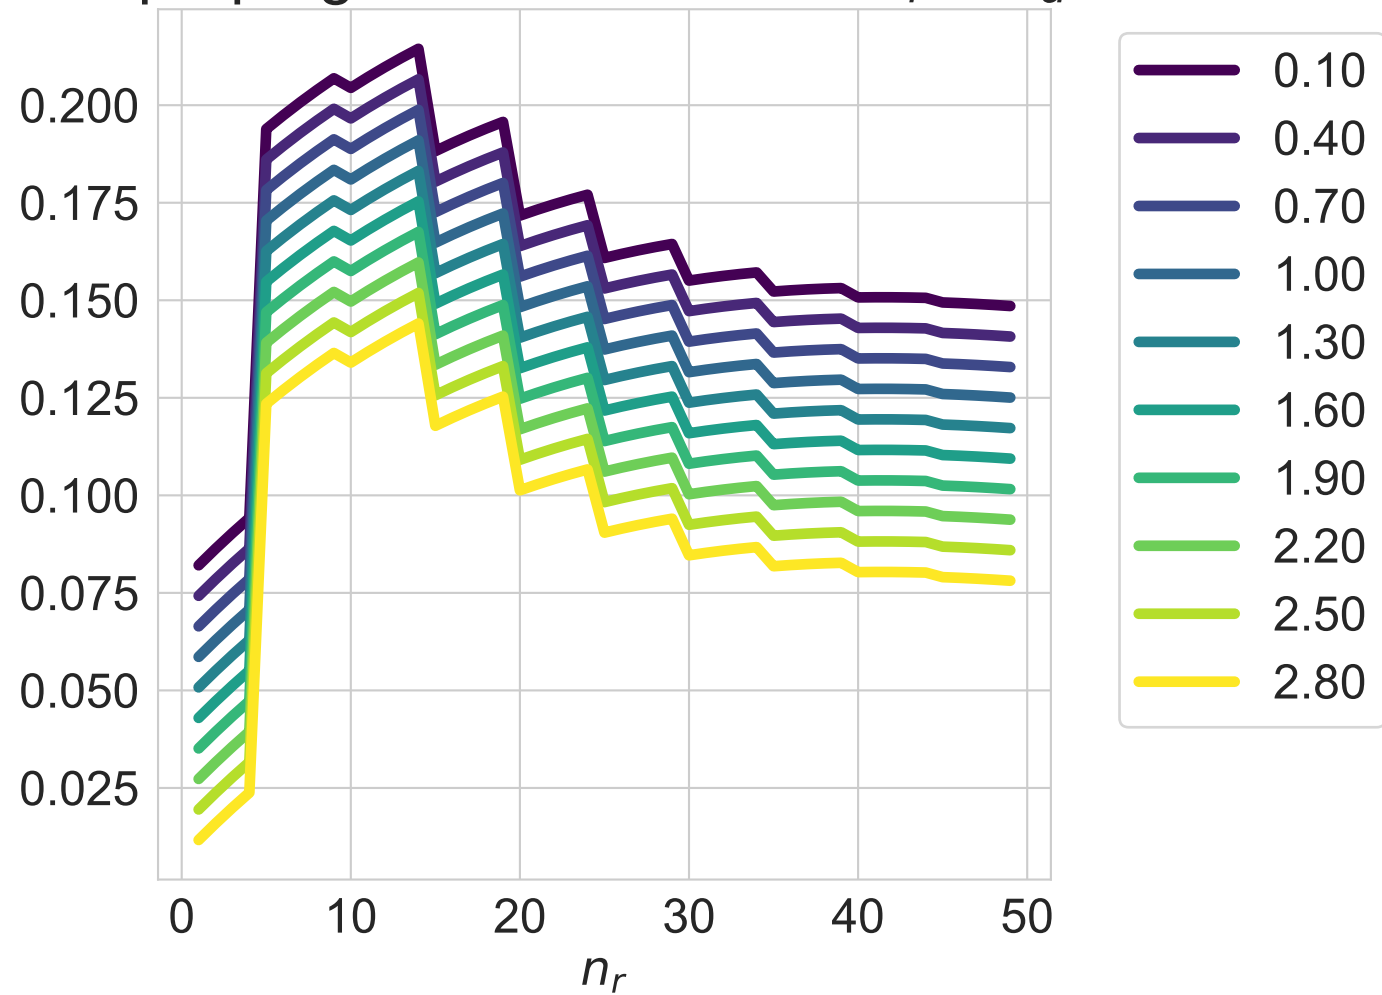

Supplement: supplementary_material [file attachment]

log feature density by confidence (10k)

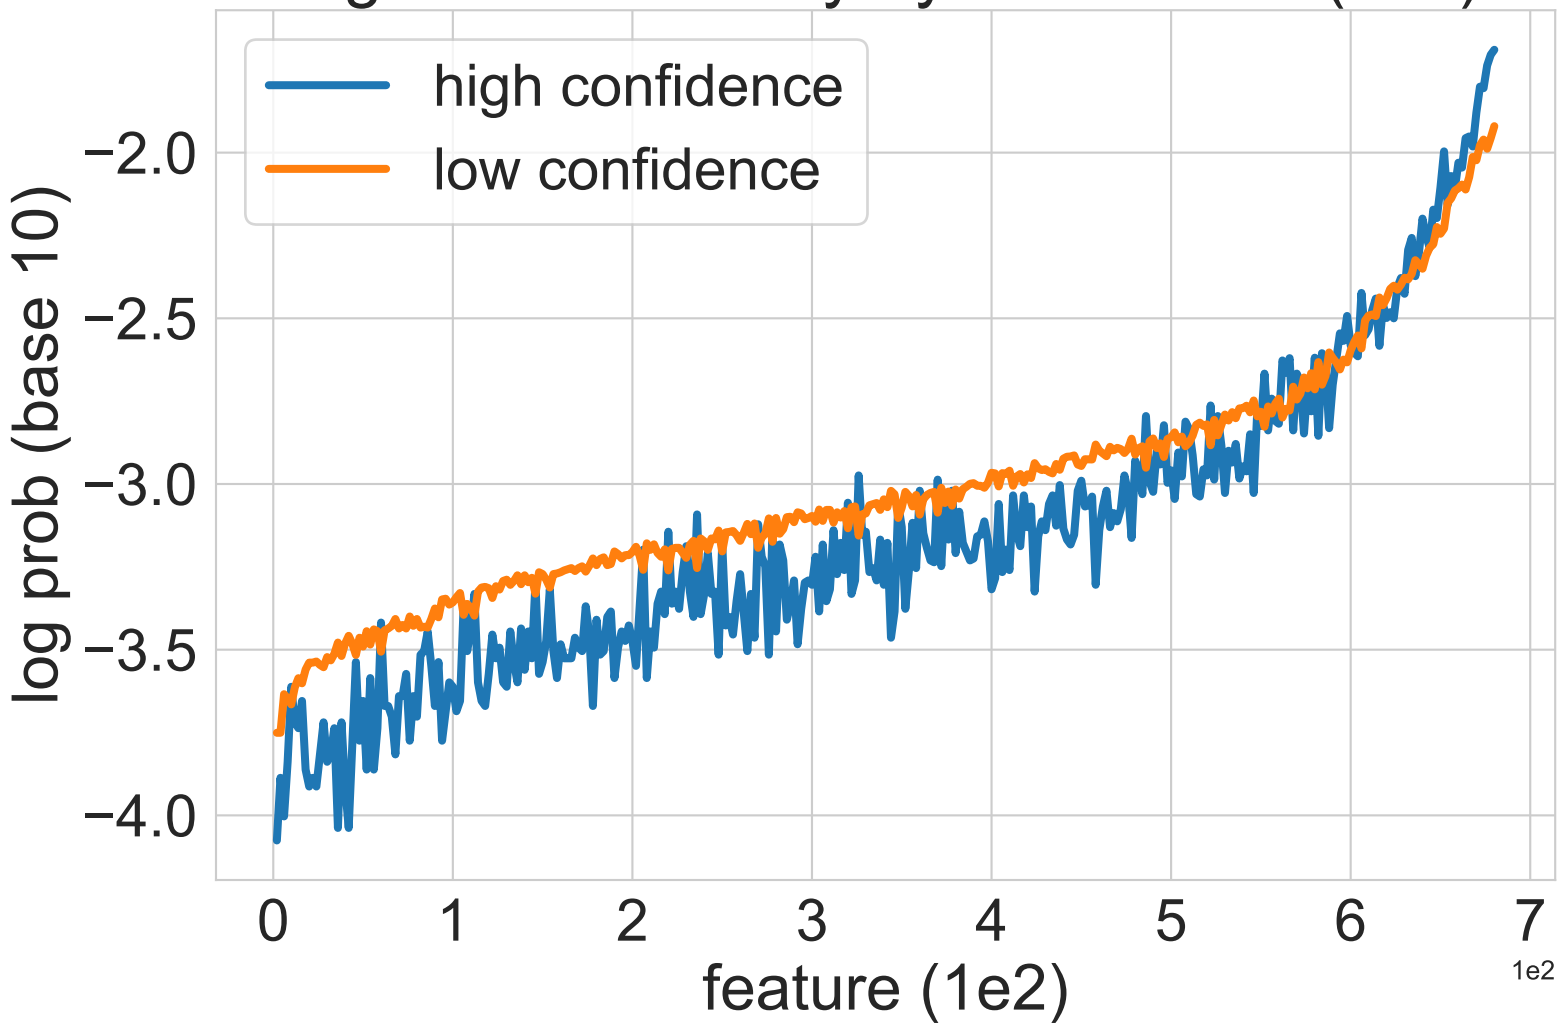

Supplement: supplementary_material [file attachment]

const agreement function:  $n_r \propto n_d$

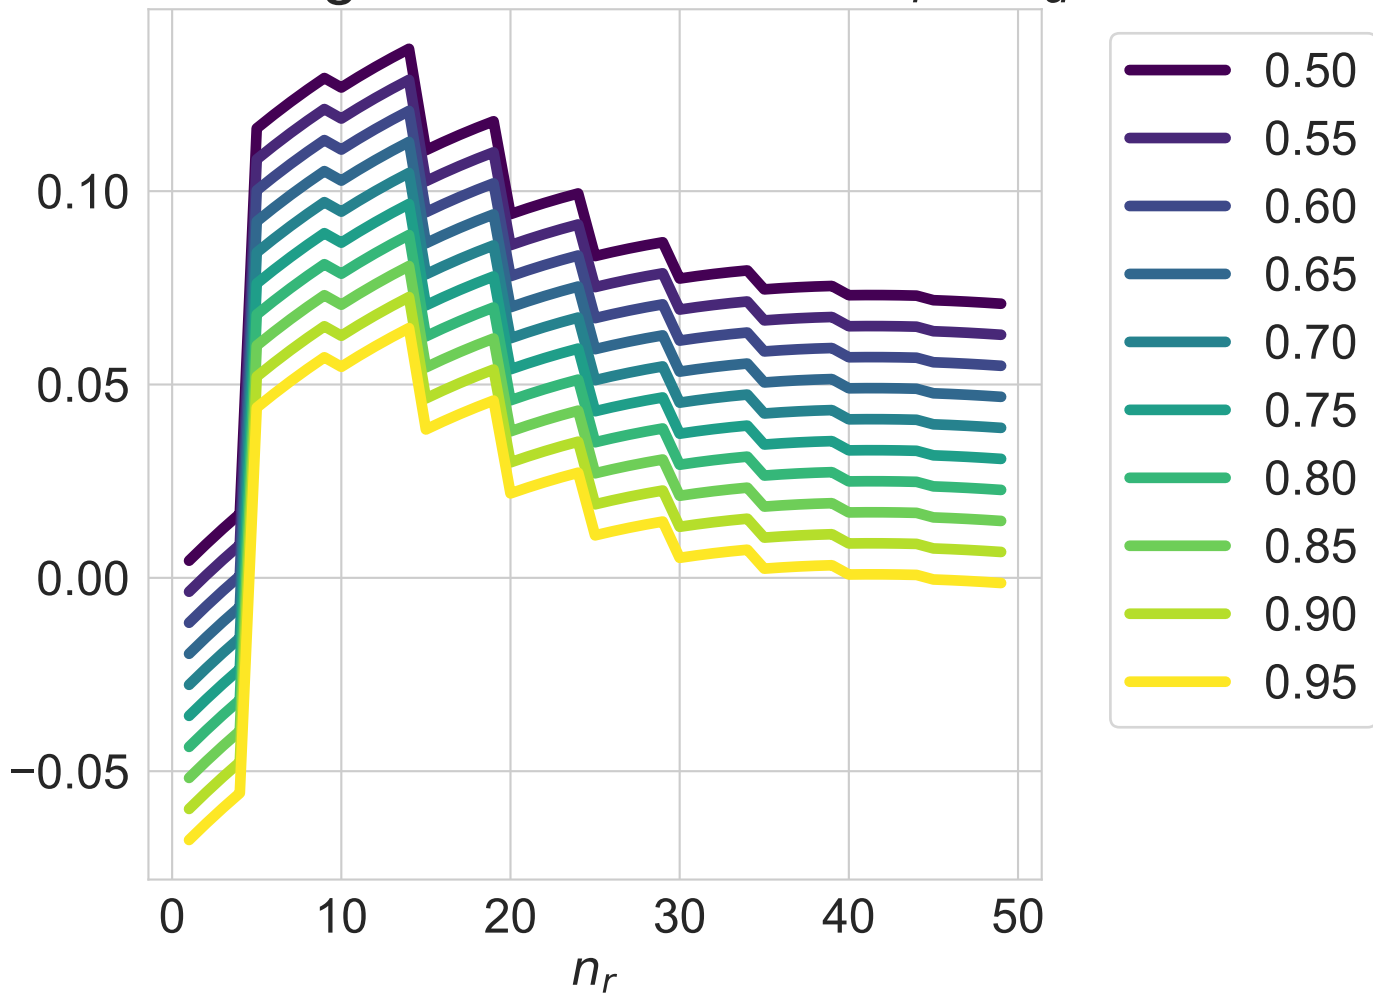

Supplement: supplementary_material [file attachment]

conf vs. feature count (10k)

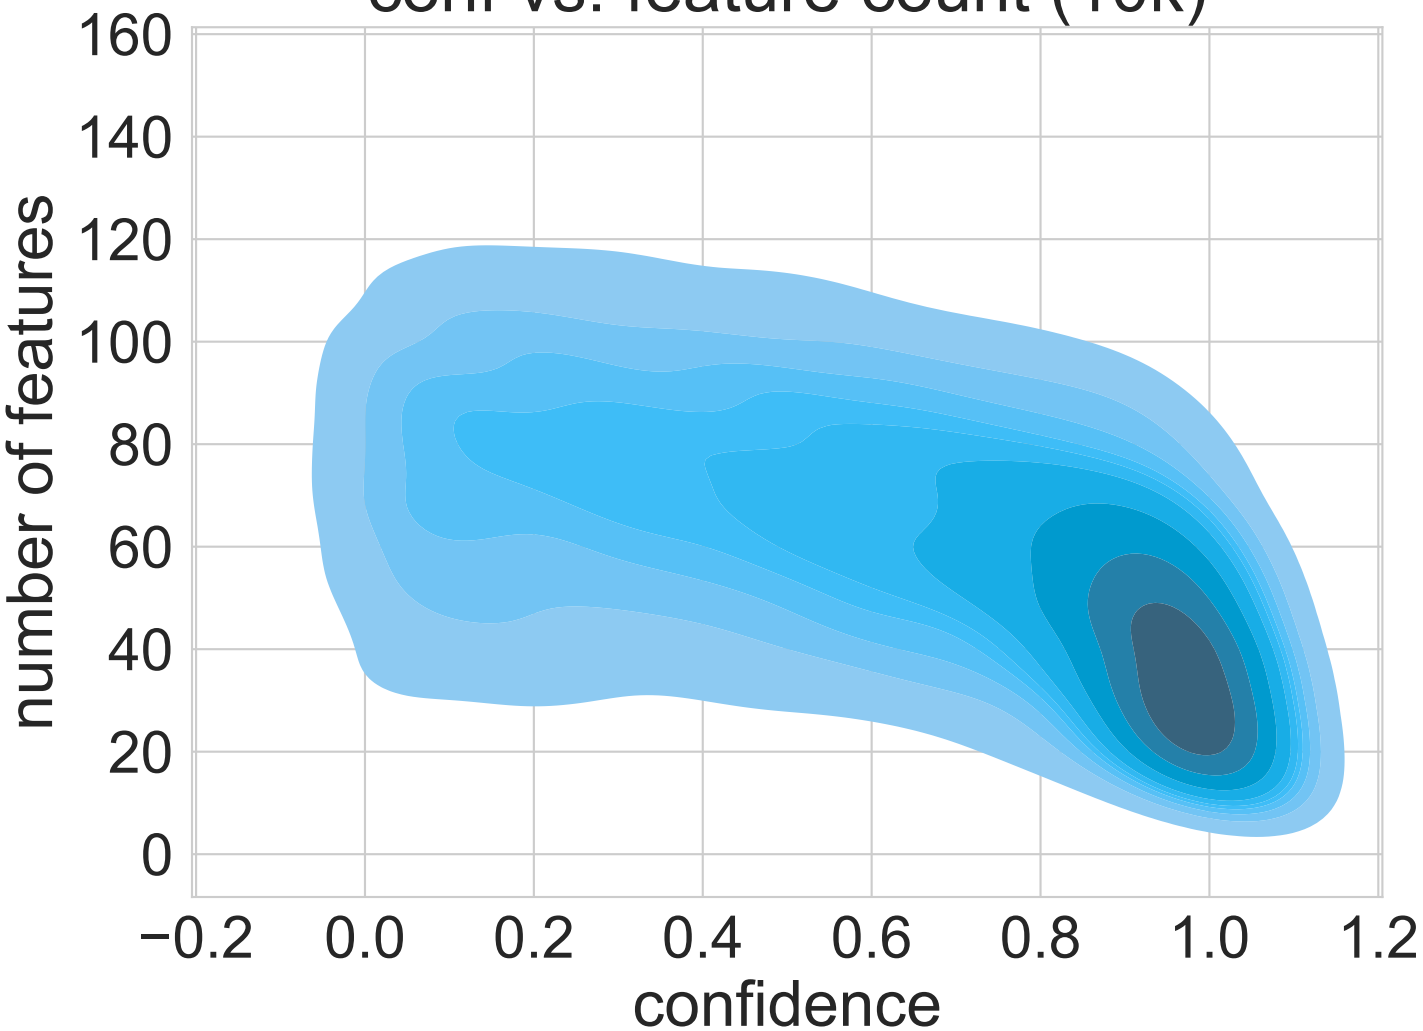

Supplement: supplementary_material [file attachment]

shared feature vs. shared error (45k)

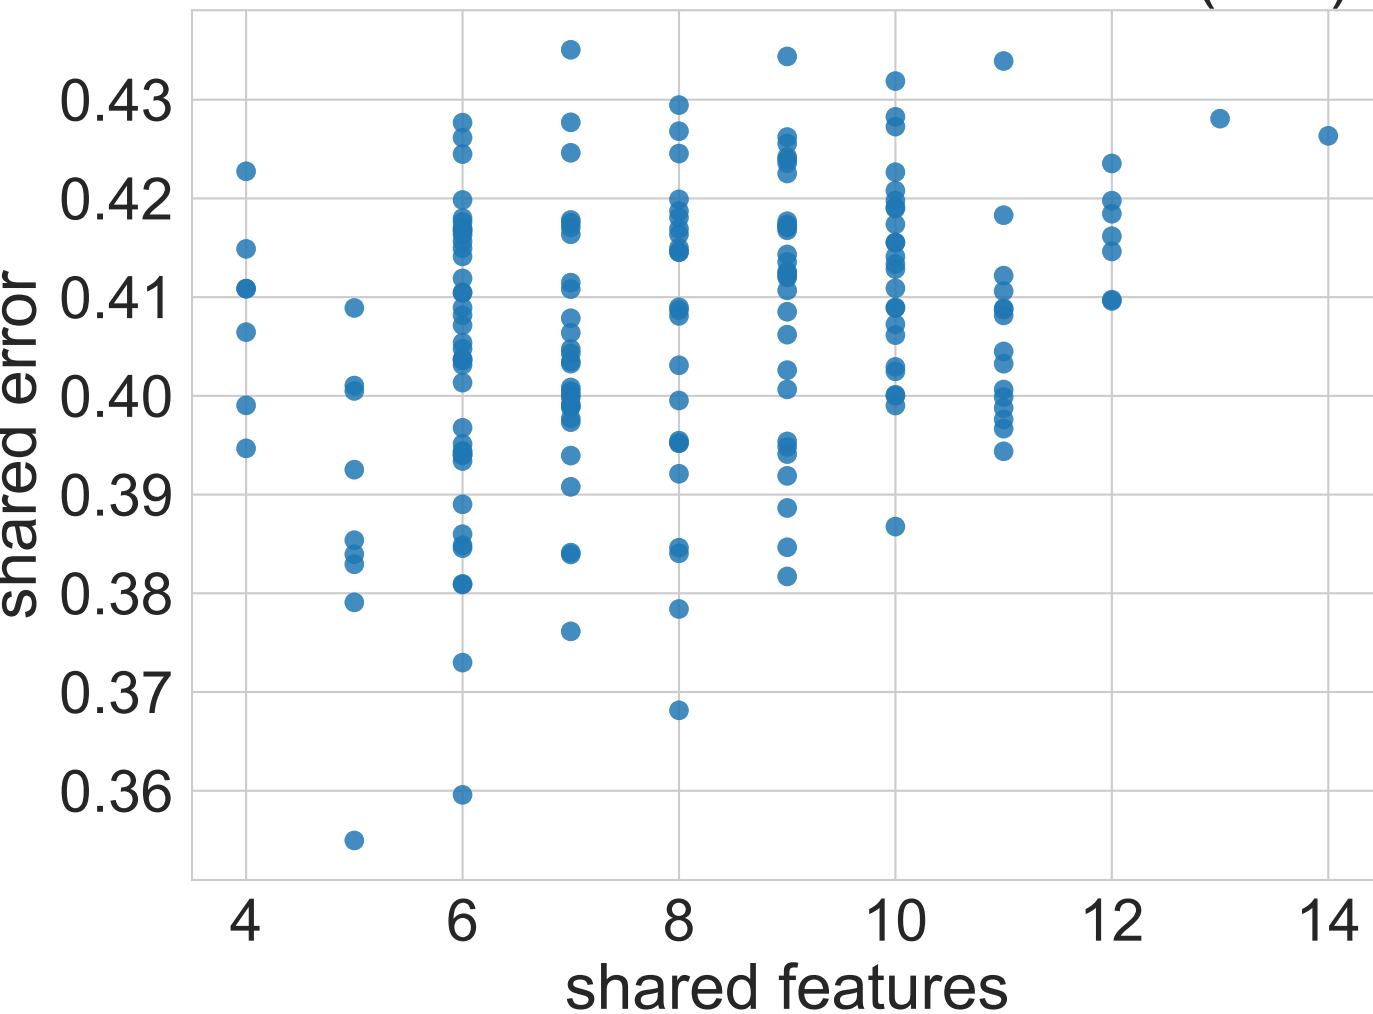

Supplement: supplementary_material [file attachment]

step agreement function:  $t_r \propto t_d$

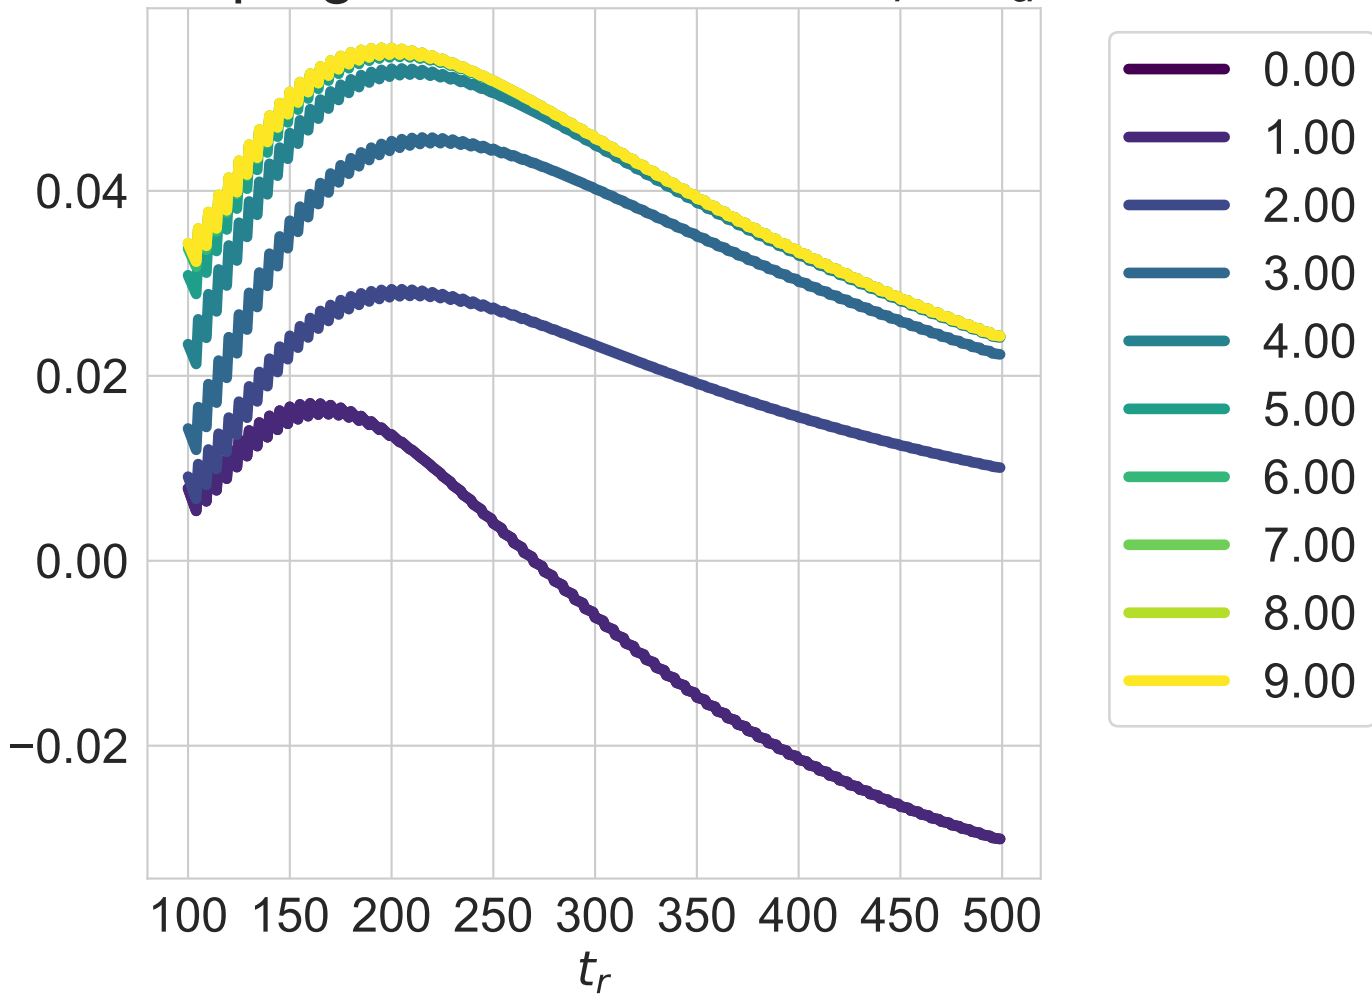

Supplement: supplementary_material [file attachment]

prop agreement function:  $p_d$

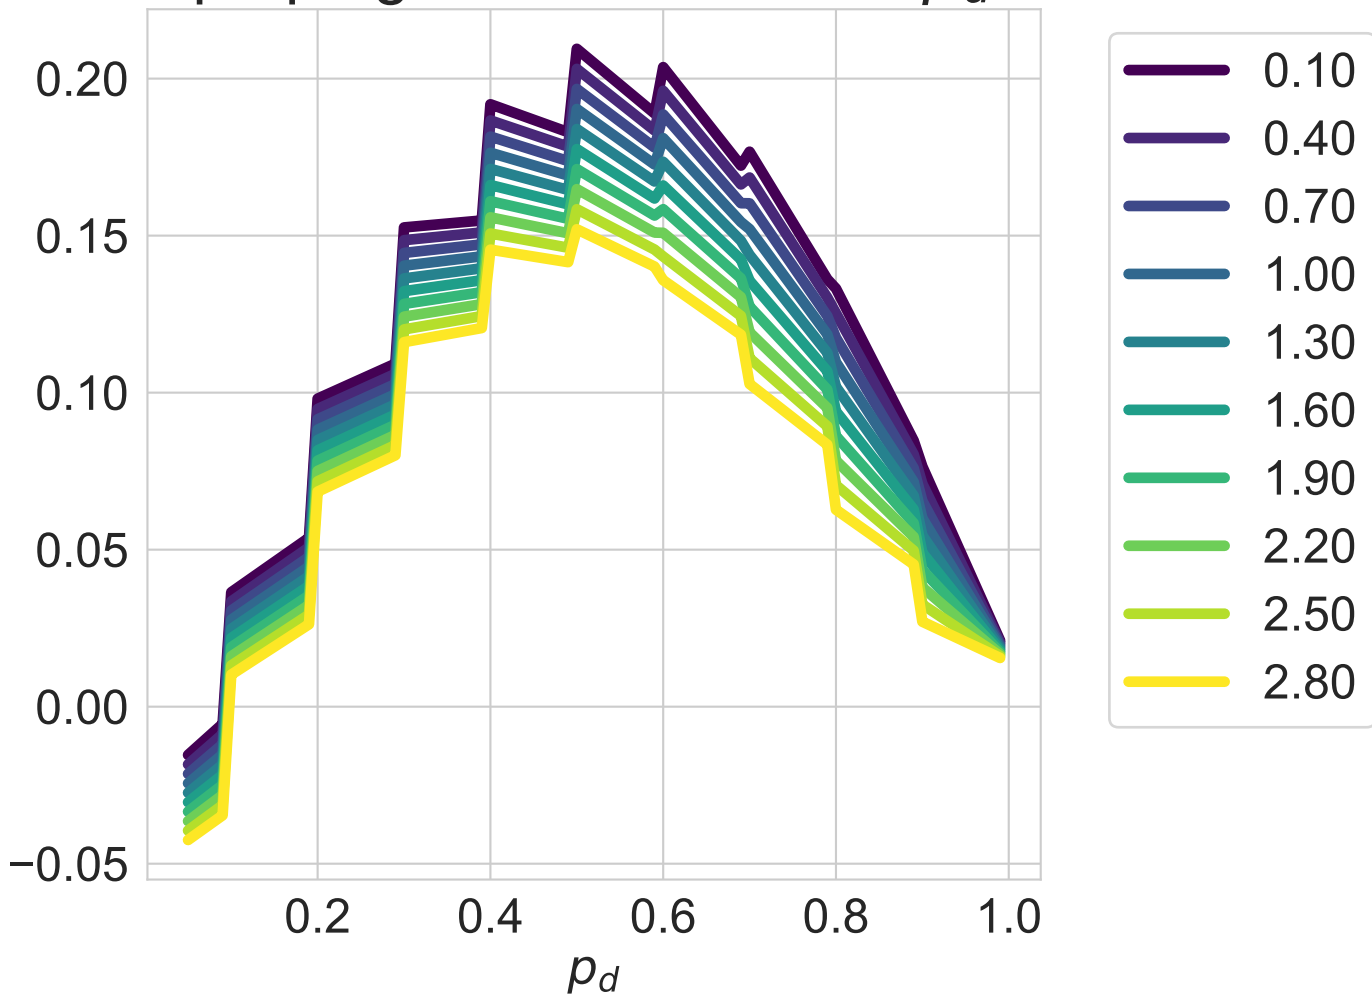

Supplement: supplementary_material [file attachment]

const agreement function:  $t_r \propto t_d$

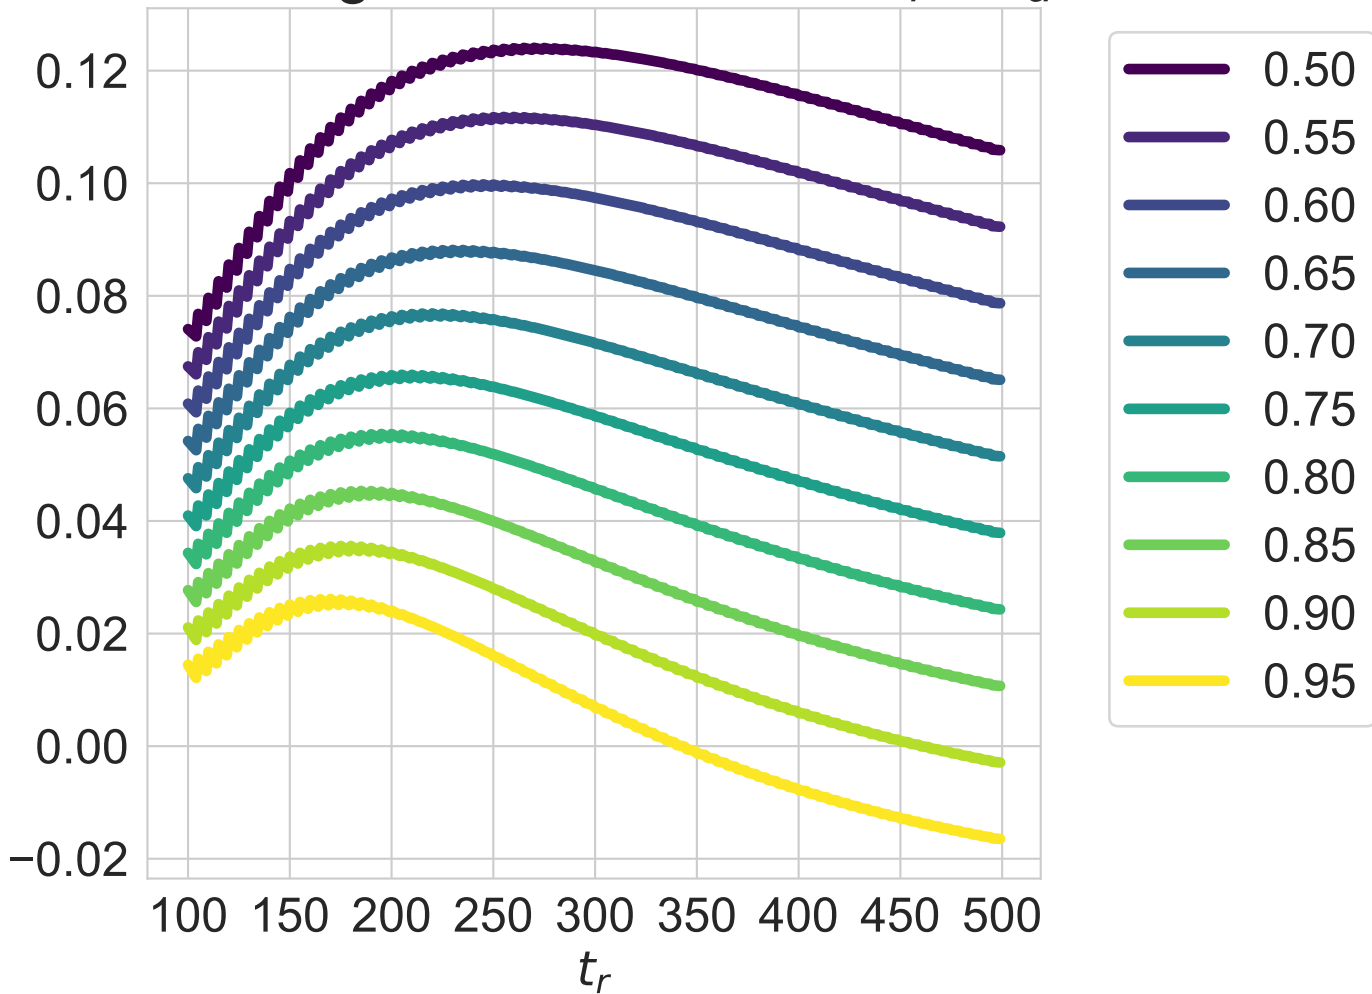

Supplement: supplementary_material [file attachment]

n data vs. n models w/ feat (10k)

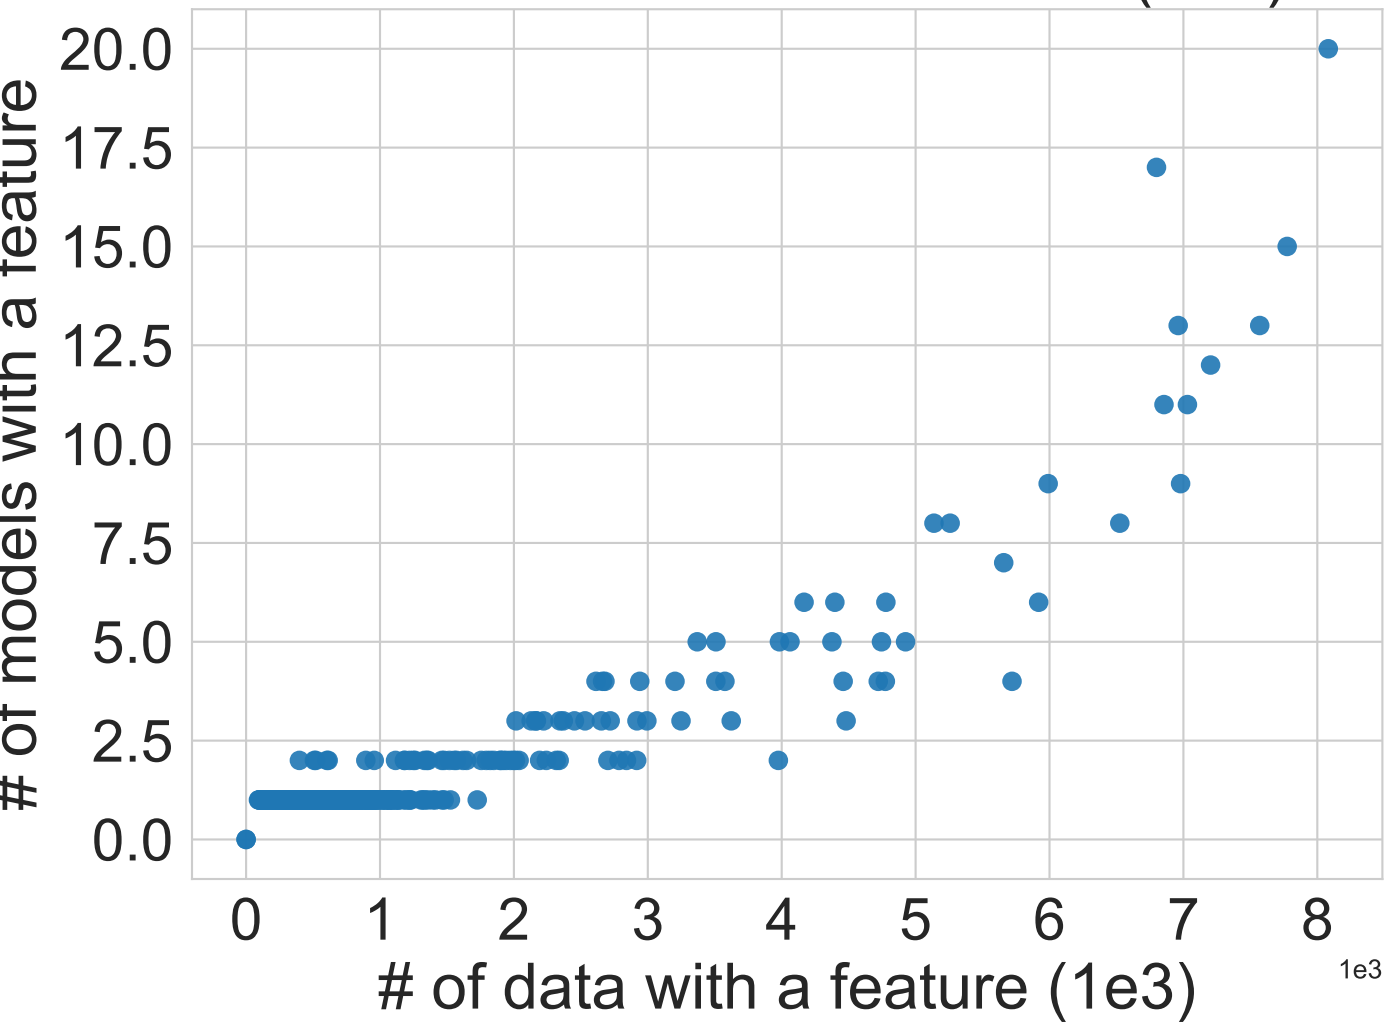

Supplement: supplementary_material [file attachment]

conf vs. feature count (45k)

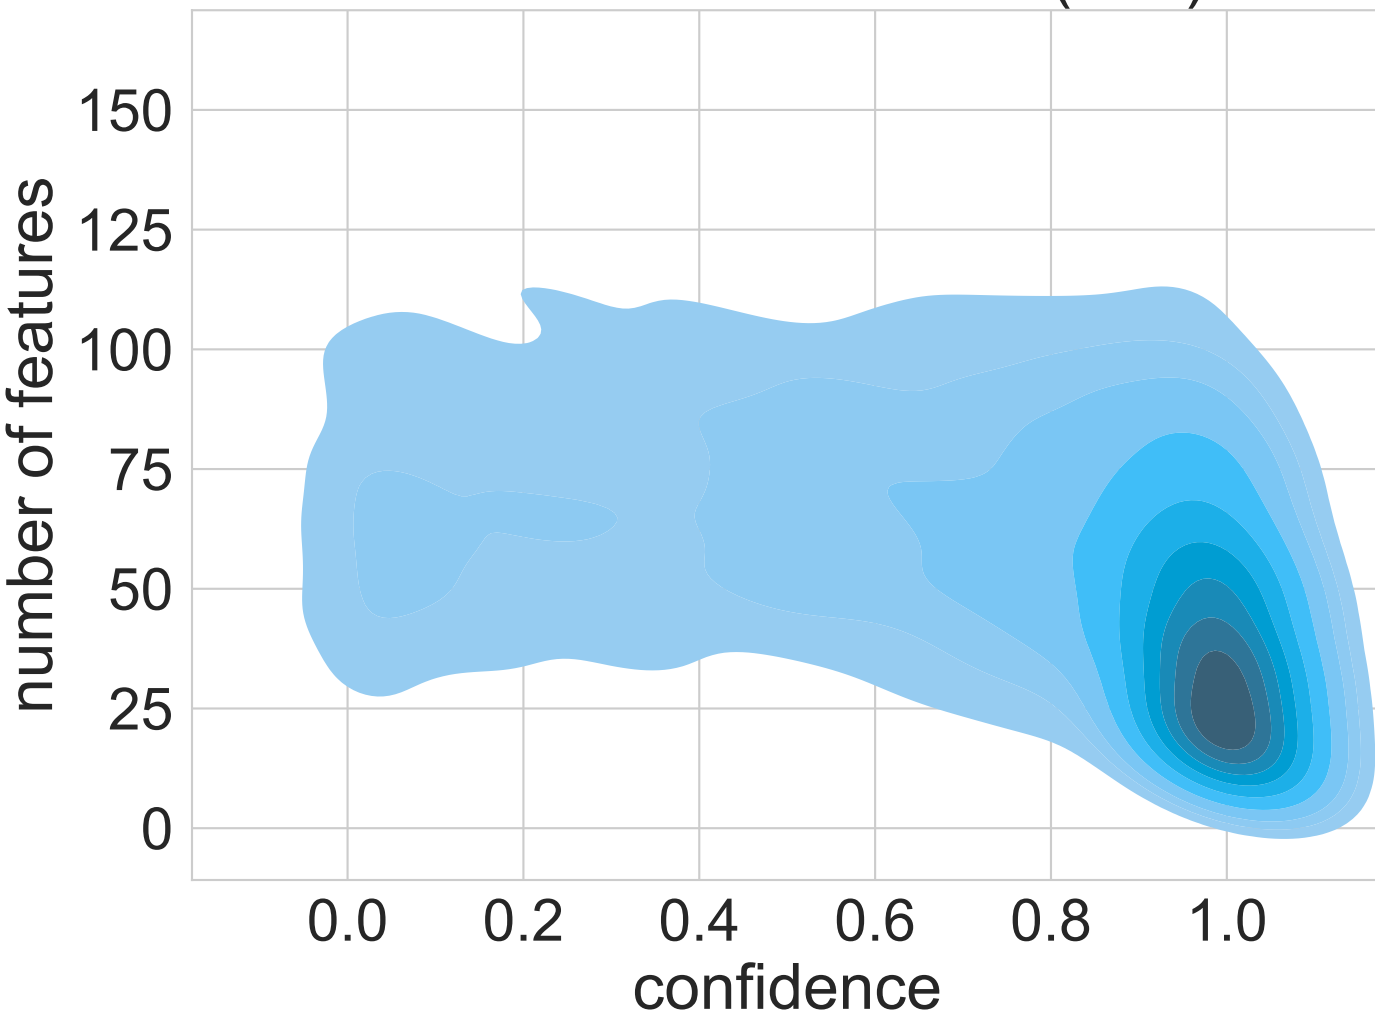

Supplement: supplementary_material [file attachment]

Correlation (10k)

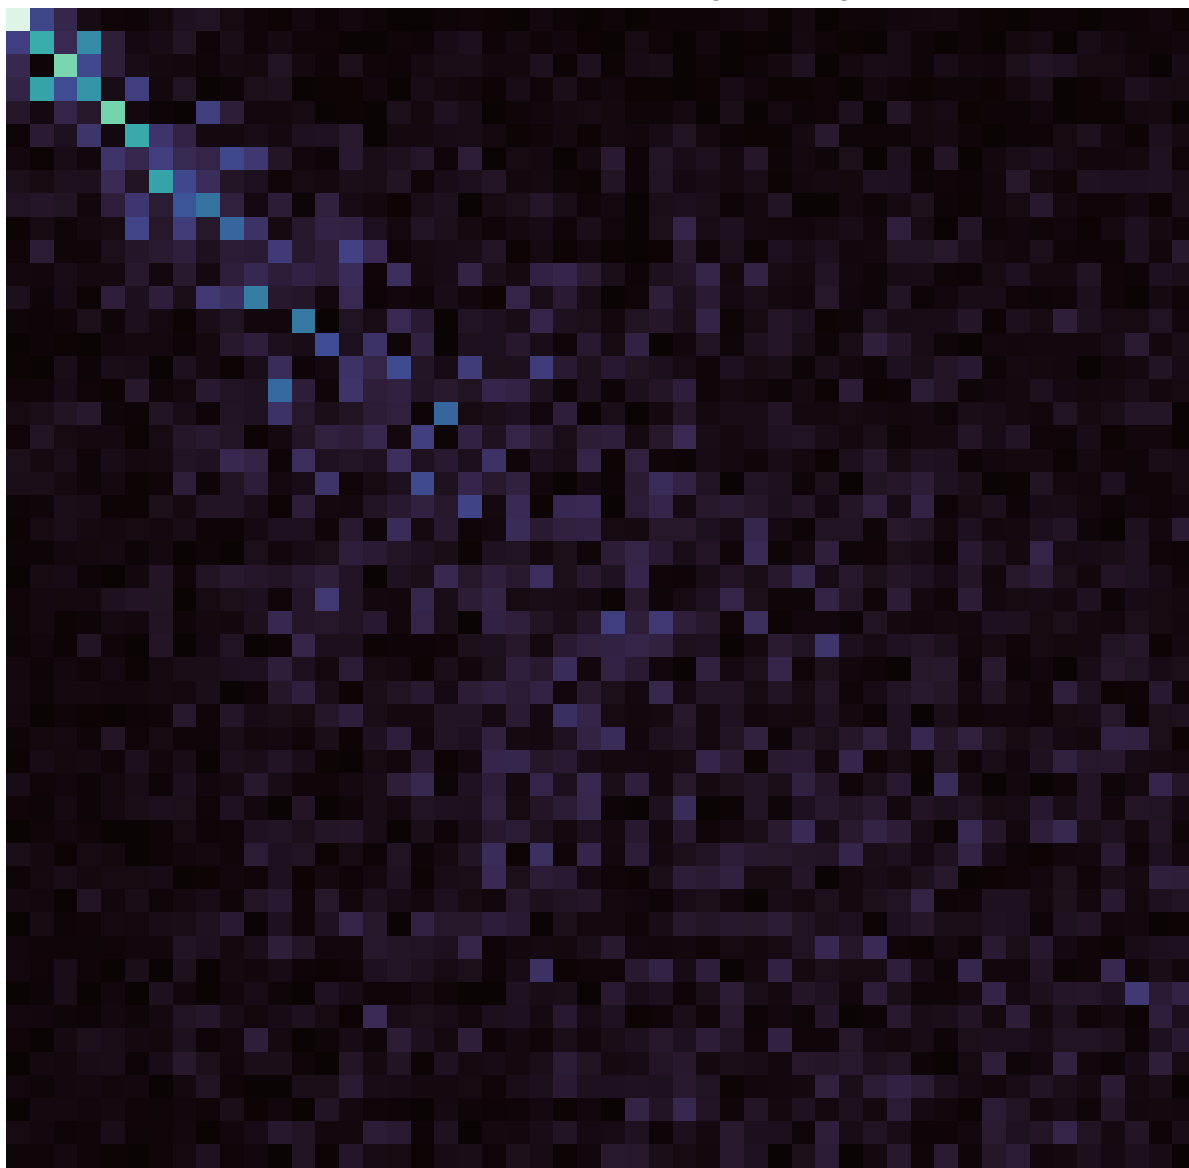

Supplement: supplementary_material [file attachment]

feature frequency (10k)

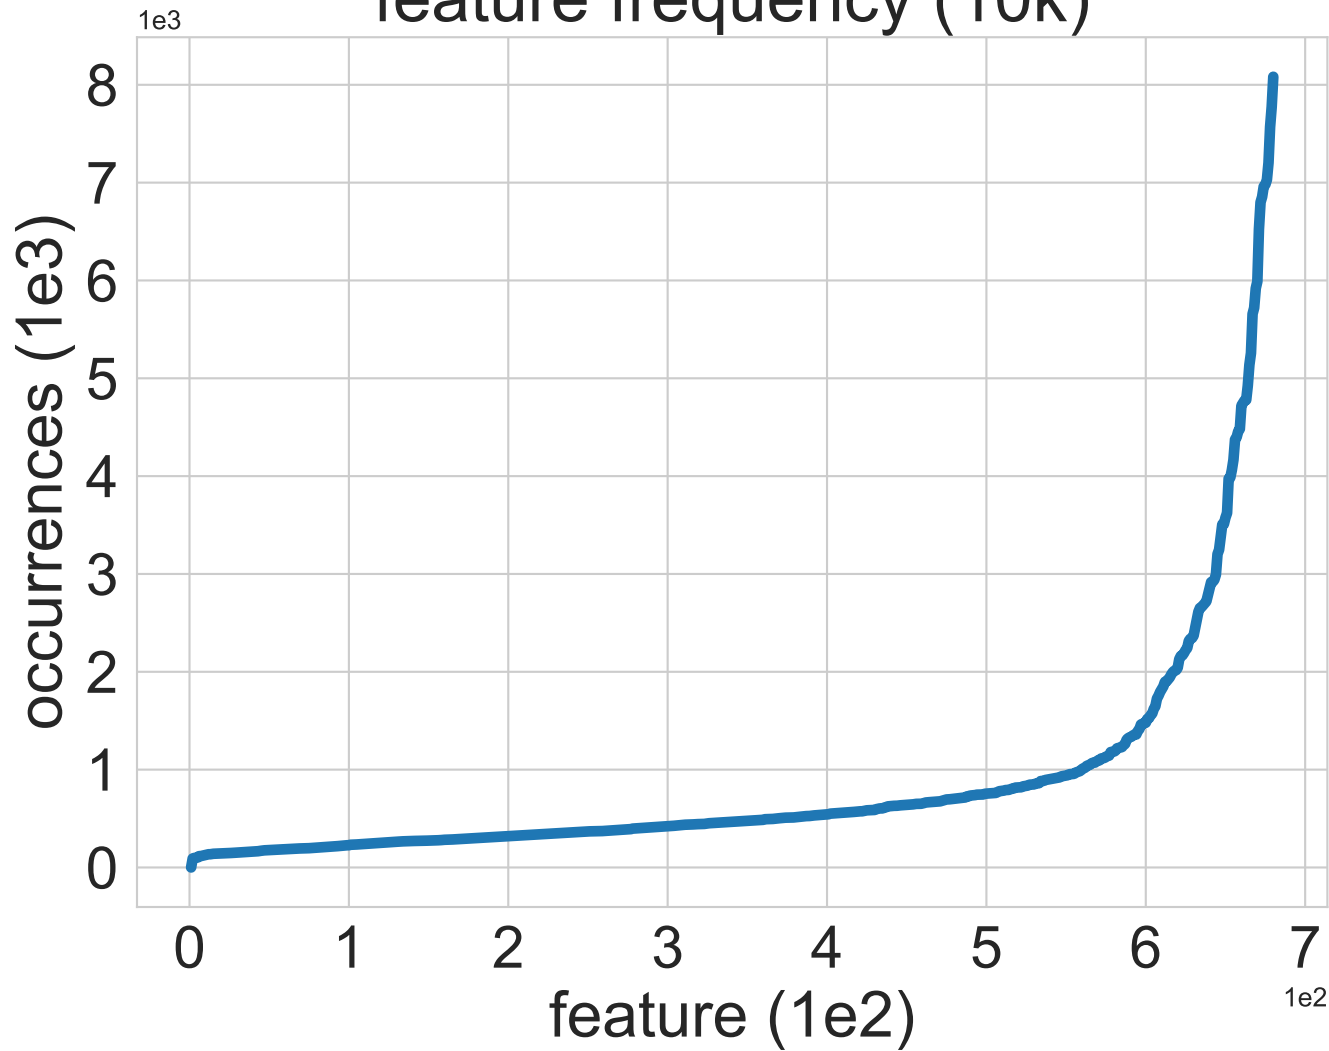

Supplement: supplementary_material [file attachment]
